# Supplementary material for: Single-Cell RNA Sequencing Reveals the Heterogeneity of Tumor-Associated Macrophage in Non-Small Cell Lung Cancer and Differences Between Sexes
Source: Front Immunol. 2021 Nov 5;12:756722. doi: 10.3389/fimmu.2021.756722 (PMC8602907; doi:10.3389/fimmu.2021.756722)
Supplement: Supplementary Table 1 — Clinical characteristics of Non-Small Cell Lung Cancer patients. [file Table_1.xlsx]

## Sheet: Sheet1
Supplementary Table 1: Clinical characteristics of Non-Small Cell Lung Cancer patitents
Dataset	Patient	Sex	Age(y)	Stage	Smoking Status	Carcinoma Type	Tissue	Treatment History	Data source	PMID	Citation
the Discovery scRNA-seq cohort
	Patient3	Male	68	IIIB	Former	Adenomatous	Tumor,Normal	Untreated	published	29988129	Lambrechts et al.
	Patient4	Female	64	IIB	Former	Adenomatous	Tumor,Normal	Untreated	published	29988129	Lambrechts et al.
	Patient5	Male	60	IA3	Former	Large cell	Tumor,Normal	Untreated	published	29988129	Lambrechts et al.
	Patient6	Female	65	IIIA	Former	Adenomatous	Tumor,Normal	Untreated	published	29988129	Lambrechts et al.
	Patient7	Male	60	IB	Former	Squamous	Tumor,Normal	Untreated	published	29988129	Lambrechts et al.
	Patient8	Male	55	IIB	Active	Pleiomorphic	Tumor,Normal	Untreated	published	29988129	Lambrechts et al.
the Validation scRNA-seq cohort 1
	Patient1	Male	79	IIA	Unkonwn	Squamous	Tumor	Untreated	published	30979687	Zilionis et al.
	Patient3	Female	61	IV	Unkonwn	Adenomatous	Tumor	Untreated	published	30979687	Zilionis et al.
	Patient4	Male	83	IA	Unkonwn	Adenomatous	Tumor	Untreated	published	30979687	Zilionis et al.
	Patient5	Female	72	IV	Unkonwn	Adenomatous	Tumor	Untreated	published	30979687	Zilionis et al.
	Patient6	Male	76	IA	Unkonwn	Adenomatous	Tumor	Untreated	published	30979687	Zilionis et al.
	Patient7	Female	63	IIIA	Unkonwn	Adenomatous	Tumor	Untreated	published	30979687	Zilionis et al.
the Validation scRNA-seq cohort 2
	P1	Male	Unkonwn	pT1b pN1	Former	Adenocarcinoma	Tumor	Untreated	published	31033233	Song Q et al.
	P2	Female	Unkonwn	pT2a pN0	Former	Squamous	Tumor	Untreated	published	31033233	Song Q et al.
the CyTOF cohort
	T002	Female	67	IA	Never	Adenomatous	Tumor	Untreated	Self-measured
	T003	Female	37	IIB	Never	Adenomatous	Tumor	Untreated	Self-measured
	T004	Female	49	IA	Never	Adenomatous	Tumor	Untreated	Self-measured
	T005	Male	63	IB	Active	Adenomatous	Tumor	Untreated	Self-measured
	T007	Male	60	IIB	Active	Adenomatous	Tumor	Untreated	Self-measured
	T008	Male	67	IB	Active	Adenomatous	Tumor	Untreated	Self-measured
	T009	Male	42	IA	Never	Adenomatous	Tumor	Untreated	Self-measured
	T010	Female	71	IB	Active	Adenomatous	Tumor	Untreated	Self-measured
