# Supplementary material for: Single-Cell RNA Sequencing Reveals the Heterogeneity of Tumor-Associated Macrophage in Non-Small Cell Lung Cancer and Differences Between Sexes
Source: Front Immunol. 2021 Nov 5;12:756722. doi: 10.3389/fimmu.2021.756722 (PMC8602907; doi:10.3389/fimmu.2021.756722)
Supplement: Supplementary Table 2 — Gene lists of signatures used to explore the functional heterogeneity of Immune Cells. [file Table_2.xlsx]

## Sheet: Sheet1
Supplementary Table 2. Gene lists of signatures used to explore the functional heterogeneity of Immune Cells. Related to Figures 2G,5A, Supplementary Figure 3A, and Supplementary Figure 6E-6H.
M1_like	M2_like	Angiogenesis	Cytokine_interaction	Phagocytosis	Matrix_remodeling	Dendritic cells Antigen_processingand_presentation	Dendritic cells Maturation
CMKLR1	IL4R	CCND2	ACVR1	ACKR2	COL11A1	AP1M2	CD40
IL12A	CCL4	CCNE1	ACVR1B	ACKR3	COL1A1	ACTR1B	CD80
IL12B	CCL13	CD44	ACVR2A	ACKR4	COL1A2	ACTR1A	CD86
IL1B	CCL20	CXCR4	ACVR2B	AGER	COL3A1	BCAP31	CD83
IL23A	CCL17	E2F3	ACVRL1	CD163	COL4A1	PSME3	RELB
IRF5	CCL18	EDN1	AMH	CD163L1	COL5A1	PSMD14
NOS2	CCL22	EZH2	AMHR2	CD36	ELN	CLEC4M
SOCS3	CCL24	FGF18	BMP2	CD5	FN1	SEC24B
TNF	LYVE1	FGFR1	BMP7	CD5L	LAMA3	IFI30
	VEGFA	FYN	BMPR1A	CD6	LAMB3	SEC23A
	VEGFB	HEY1	BMPR1B	CFI	LAMC2	DCTN2
	VEGFC	ITGAV	BMPR2	COLEC12	LGALS7	CENPE
	VEGFD	JAG1	CCL1	CXCL16	LGALS9	DCTN6
	EGF	JAG2	CCL11	DMBT1	TNC	SEC24A
	CTSA	MMP9	CCL13	ENDOU	VTN	KIF2C
	CTSB	NOTCH1	CCL14	ENPP1	ADAMTS4	KIF3A
	CTSC	PDGFA	CCL15	ENPP2	ADAMTS5	DCTN3
	CTSD	PTK2	CCL16	HHIPL1	CA9	CHUK
	TGFB1	SPP1	CCL17	LGALS3BP	LOX	OSBPL1A
	TGFB2	STC1	CCL18	LOXL2	MMP1	AP2M1
	TGFB3	TNFAIP6	CCL19	LOXL3	MMP11	AP1S1
	MMP14	TYMP	CCL2	LOXL4	MMP12	AP2S1
	MMP19	VAV2	CCL20	LRP1	MMP2	CLTA
	MMP9	VCAN	CCL21	MARCO	MMP3	CLTC
	CLEC7A	VEGFA	CCL22	MEGF10	MMP7	PSMB11
	WNT7B		CCL23	MSR1	MMP9	AP1S3
	FASL		CCL24	PGBD1	PLOD2	DYNLL2
	TNFSF12		CCL25	PRG4		PSMA8
	TNFSF8		CCL26	PRSS12		CTSD
	CD276		CCL27	SCARA3		CTSE
	VTCN1		CCL28	SCARA5		CTSL
	MSR1		CCL3	SCARB1		CTSV
	FN1		CCL3L1	SCARB2		CTSS
	IRF4		CCL3L3	SCARF1		CYBA
	IL10		CCL4	SCARF2		CYBB
	CD163		CCL4L2	SCART1		AP2A1
	CSF1R		CCL5	SSC4D		AP2A2
	IL4I1		CCL7	SSC5D		AP1B1
	MRC1		CCL8	STAB1		AP2B1
	SIGLEC1		CCR1	STAB2		ACE
			CCR10	TMPRSS13		DCTN1
			CCR2	TMPRSS15		AP1G1
			CCR3	TMPRSS2		DYNC1H1
			CCR4	TMPRSS3		DYNC1I1
			CCR5	TMPRSS4		DYNC1I2
			CCR6	TMPRSS5		DYNC1LI2
			CCR7	VTN		DNM2
			CCR8			FCER1G
			CCR9			FCGR1A
			CD27			FCGR1B
			CD40			FCGR2B
			CD40LG			SEC31A
			CD70			KIFAP3
			CLCF1			PSME4
			CNTF			KIF4A
			CNTFR			KIF26A
			CRLF2			KIF4B
			CSF1			PYCARD
			CSF1R			RACGAP1
			CSF2			PDIA3
			CSF2RA			HFE
			CSF2RB			CD209
			CSF3			HLA-A
			CSF3R			HLA-B
			CTF1			HLA-C
			CX3CL1			HLA-DMA
			CX3CR1			HLA-DMB
			CXCL1			HLA-DOA
			CXCL10			HLA-DOB
			CXCL11			HLA-DPA1
			CXCL12			HLA-DPB1
			CXCL13			HLA-DQA1
			CXCL14			HLA-DQA2
			CXCL16			HLA-DQB1
			CXCL2			HLA-DQB2
			CXCL3			HLA-DRA
			CXCL5			HLA-DRB1
			CXCL6			HLA-DRB3
			CXCL8			HLA-DRB4
			CXCL9			HLA-DRB5
			CXCR1			HLA-E
			CXCR2			HLA-F
			CXCR3			HLA-G
			CXCR4			HLA-H
			CXCR5			MR1
			CXCR6			IKBKB
			EDA			ITGAV
			EDA2R			ITGB5
			EDAR			ARF1
			EGF			KIF2A
			EGFR			KIF3C
			EPO			KIF5A
			EPOR			KLC1
			FAS			KIF11
			FASLG			KIF22
			FLT1			LAG3
			FLT3			LNPEP
			FLT3LG			NCF2
			FLT4			NCF4
			GDF5			CD207
			GH1			CLEC4A
			GH2			SAR1B
			GHR			DYNC1LI1
			HGF			DCTN4
			IFNA1			ERAP1
			IFNA10			TREM2
			IFNA13			MARCHF1
			IFNA14			TAPBPL
			IFNA16			ACTR10
			IFNA17			LGMN
			IFNA2			B2M
			IFNA21			PSMA1
			IFNA4			PSMA2
			IFNA5			PSMA3
			IFNA6			PSMA4
			IFNA7			PSMA5
			IFNA8			PSMA6
			IFNAR1			PSMA7
			IFNAR2			PSMB1
			IFNB1			PSMB2
			IFNE			PSMB3
			IFNG			PSMB4
			IFNGR1			PSMB5
			IFNGR2			PSMB6
			IFNK			PSMB7
			IFNL1			PSMB8
			IFNL2			PSMB9
			IFNL3			PSMB10
			IFNLR1			KIF15
			IFNW1			PSMC1
			IL10			PSMC2
			IL10RA			PSMC3
			IL10RB			PSMC4
			IL11			PSMC5
			IL11RA			PSMC6
			IL12A			PSMD1
			IL12B			PSMD2
			IL12RB1			PSMD3
			IL12RB2			PSMD4
			IL13			PSMD5
			IL13RA1			PSMD7
			IL15			PSMD8
			IL15RA			PSMD9
			IL17A			PSMD10
			IL17B			PSMD11
			IL17RA			PSMD12
			IL17RB			PSMD13
			IL18			PSME1
			IL18R1			PSME2
			IL18RAP			SEC13
			IL19			ERAP2
			IL1A			SH3GL2
			IL1B			KLC2
			IL1R1			NCF1
			IL1R2			SLC11A1
			IL1RAP			SPTBN2
			IL2			TAP1
			IL20			TAP2
			IL20RA			TAPBP
			IL20RB			TRAF6
			IL21			RAB7A
			IL21R			CALR
			IL22			KIF18A
			IL22RA1			CANX
			IL22RA2			CAPZA1
			IL23A			CAPZA2
			IL23R			CAPZB
			IL24			RILP
			IL25			DCTN5
			IL26			KIF2B
			IL2RA			IKBKG
			IL2RB			DYNLL1
			IL2RG			VAMP8
			IL3			CTSF
			IL3RA			SNAP23
			IL4			AP1S2
			IL4R			AP1M1
			IL5			VAMP3
			IL5RA			CAPZA3
			IL6			KIF3B
			IL6R			CD36
			IL6ST			PSMF1
			IL7			AC027237.1
			IL7R			SEC22B
			IL9			SEC24C
			IL9R			CD74
			INHBA			PSMD6
			INHBB			SEC24D
			INHBC
			INHBE
			KDR
			KIT
			KITLG
			LEP
			LEPR
			LIF
			LIFR
			LTA
			LTB
			LTBR
			MET
			MPL
			NGFR
			OSM
			OSMR
			PDGFA
			PDGFB
			PDGFC
			PDGFRA
			PDGFRB
			PF4
			PF4V1
			PLEKHO2
			PPBP
			PPBPP1
			PRL
			PRLR
			RELT
			TGFB1
			TGFB2
			TGFB3
			TGFBR1
			TGFBR2
			TNF
			TNFRSF10A
			TNFRSF10B
			TNFRSF10C
			TNFRSF10D
			TNFRSF11A
			TNFRSF11B
			TNFRSF12A
			TNFRSF13B
			TNFRSF13C
			TNFRSF14
			TNFRSF17
			TNFRSF18
			TNFRSF19
			TNFRSF1A
			TNFRSF1B
			TNFRSF21
			TNFRSF25
			TNFRSF4
			TNFRSF6B
			TNFRSF8
			TNFRSF9
			TNFSF10
			TNFSF11
			TNFSF12
			TNFSF13
			TNFSF13B
			TNFSF14
			TNFSF15
			TNFSF18
			TNFSF4
			TNFSF8
			TNFSF9
			TPO
			TSLP
			VEGFA
			VEGFB
			VEGFC
			VEGFD
			XCL1
			XCL2
			XCR1
