# Supplementary material for: Single-Cell RNA Sequencing Reveals the Heterogeneity of Tumor-Associated Macrophage in Non-Small Cell Lung Cancer and Differences Between Sexes
Source: Front Immunol. 2021 Nov 5;12:756722. doi: 10.3389/fimmu.2021.756722 (PMC8602907; doi:10.3389/fimmu.2021.756722)
Supplement: Supplementary Table 3 — Differentially Expressed Genes among Myeloid clusters in the discovery single-cell data and validation single-cell data 1. [file Table_3.xlsx]

## Sheet: Discovery Single-Cell Data
Supplementary Table 3. Differentially Expressed Genes among Myeloid clusters in the Discovery Single-Cell Data
p_val	avg_logFC	pct.1	pct.2	p_val_adj	cluster	gene	cell_type
3.18855e-296	1.83773	0.986	0.606	1.04387e-291	0	SPP1	SPP1+Macro
6.12063e-279	0.715062	0.715	0.168	2.00377e-274	0	MMP9	SPP1+Macro
1.9154e-228	0.898462	1	0.975	6.27063e-224	0	CSTB	SPP1+Macro
1.35786e-197	0.610455	1	0.997	4.44535e-193	0	GAPDH	SPP1+Macro
8.8441e-197	0.609699	0.727	0.25	2.89538e-192	0	IL1RN	SPP1+Macro
3.76468e-173	0.384985	0.999	0.972	1.23248e-168	0	ALDOA	SPP1+Macro
1.20711e-170	0.250846	0.764	0.316	3.95183e-166	0	SDC2	SPP1+Macro
5.87925e-157	0.471663	0.986	0.672	1.92475e-152	0	C15orf48	SPP1+Macro
1.53564e-151	0.288423	0.952	0.715	5.02737e-147	0	MIF	SPP1+Macro
3.69536e-140	0.384663	0.945	0.693	1.20979e-135	0	PLAUR	SPP1+Macro
6.11211e-128	0.305362	0.387	0.085	2.00098e-123	0	CHI3L1	SPP1+Macro
1.51999e-126	0.29418	0.988	0.907	4.97615e-122	0	PKM	SPP1+Macro
7.67035e-122	0.353797	0.99	0.916	2.51112e-117	0	LDHA	SPP1+Macro
1.06268e-105	0.463066	1	0.994	3.479e-101	0	VIM	SPP1+Macro
3.94849e-103	0.503248	0.283	0.054	1.29266e-98	0	MMP7	SPP1+Macro
6.63071e-100	0.56647	0.628	0.271	2.17076e-95	0	CCL3	SPP1+Macro
2.36689e-99	0.527698	1	1	7.74874e-95	0	FTH1	SPP1+Macro
3.03829e-92	0.415266	0.472	0.163	9.94675e-88	0	G0S2	SPP1+Macro
2.61197e-89	0.376963	1	0.984	8.55107e-85	0	LGALS1	SPP1+Macro
5.02314e-85	0.348134	0.896	0.703	1.64448e-80	0	FBP1	SPP1+Macro
2.72456e-83	0.471135	0.936	0.785	8.91966e-79	0	FABP5	SPP1+Macro
1.17206e-75	0.300631	1	0.976	3.83709e-71	0	S100A10	SPP1+Macro
2.65828e-71	0.392042	0.923	0.733	8.70268e-67	0	SOD2	SPP1+Macro
5.05688e-61	0.569654	0.508	0.236	1.65552e-56	0	IL8	SPP1+Macro
1.80209e-56	0.263525	0.698	0.434	5.89969e-52	0	RGCC	SPP1+Macro
5.55994e-53	0.42469	0.908	0.769	1.82021e-48	0	MT2A	SPP1+Macro
7.61249e-49	0.257841	0.951	0.722	2.49218e-44	0	CTSL	SPP1+Macro
7.75152e-34	0.514469	0.476	0.287	2.53769e-29	0	CCL4	SPP1+Macro
1.49349e-17	0.258066	0.306	0.17	4.88937e-13	0	CCL2	SPP1+Macro
0	1.16139	0.893	0.103	0	1	FABP4	CCL18+Macro
0	0.720964	0.997	0.571	0	1	MARCO	CCL18+Macro
0	0.698088	0.992	0.522	0	1	GCHFR	CCL18+Macro
0	0.500792	0.988	0.608	0	1	ALDH2	CCL18+Macro
0	0.499031	0.943	0.233	0	1	C19orf59	CCL18+Macro
0	0.472908	0.892	0.156	0	1	CES1	CCL18+Macro
0	0.294882	0.703	0.08	0	1	RBP4	CCL18+Macro
0	0.293879	0.781	0.139	0	1	RETN	CCL18+Macro
9.96023e-281	0.754358	0.992	0.791	3.26078e-276	1	SERPINA1	CCL18+Macro
1.55512e-250	0.269382	0.954	0.475	5.09115e-246	1	LTA4H	CCL18+Macro
7.82293e-242	0.316947	0.978	0.64	2.56107e-237	1	GLRX	CCL18+Macro
9.24602e-226	0.270676	0.927	0.445	3.02696e-221	1	CRIP1	CCL18+Macro
1.26411e-219	0.345919	0.994	0.938	4.13844e-215	1	TCEB2	CCL18+Macro
2.13639e-186	0.385208	1	0.962	6.99412e-182	1	UBB	CCL18+Macro
4.10087e-186	0.620986	1	1	1.34254e-181	1	FTH1	CCL18+Macro
4.79379e-183	0.519017	0.997	0.853	1.56939e-178	1	LGALS3	CCL18+Macro
5.44872e-180	0.447117	1	1	1.7838e-175	1	TMSB4X	CCL18+Macro
6.87897e-179	0.581674	0.99	0.814	2.25204e-174	1	CD52	CCL18+Macro
1.02855e-176	0.26127	0.971	0.646	3.36726e-172	1	SNX10	CCL18+Macro
1.76457e-171	0.26815	0.928	0.476	5.77687e-167	1	MSR1	CCL18+Macro
7.09156e-170	0.317532	0.989	0.739	2.32163e-165	1	MS4A7	CCL18+Macro
2.42882e-166	0.288881	0.953	0.534	7.95149e-162	1	VSIG4	CCL18+Macro
1.6398e-162	0.363493	0.961	0.492	5.36839e-158	1	NUPR1	CCL18+Macro
2.43439e-154	0.500652	1	0.99	7.9697e-150	1	S100A6	CCL18+Macro
1.43601e-152	0.70741	0.983	0.701	4.70121e-148	1	C1QB	CCL18+Macro
1.1765e-151	0.57432	0.97	0.628	3.85163e-147	1	CCL18	CCL18+Macro
2.68971e-145	0.620272	1	1	8.80557e-141	1	FTL	CCL18+Macro
2.23745e-144	0.35582	0.975	0.646	7.32496e-140	1	ALOX5AP	CCL18+Macro
1.25015e-140	0.501309	0.965	0.622	4.09275e-136	1	S100A8	CCL18+Macro
2.02211e-136	0.279014	0.994	0.91	6.62e-132	1	TSPO	CCL18+Macro
7.18312e-125	0.25735	0.992	0.731	2.35161e-120	1	ACP5	CCL18+Macro
1.2102e-123	0.519379	0.994	0.723	3.96195e-119	1	C1QA	CCL18+Macro
1.2451e-117	0.298873	0.994	0.922	4.0762e-113	1	GRN	CCL18+Macro
1.25622e-116	0.250338	0.979	0.879	4.11263e-112	1	TAGLN2	CCL18+Macro
4.04188e-95	0.46534	0.999	0.848	1.32323e-90	1	APOC1	CCL18+Macro
6.75015e-95	0.381797	0.994	0.928	2.20986e-90	1	S100A4	CCL18+Macro
9.89287e-95	0.311601	0.999	0.81	3.23873e-90	1	S100A9	CCL18+Macro
2.6039e-89	0.305886	0.999	0.999	8.52466e-85	1	HLA-B	CCL18+Macro
1.48474e-84	0.284883	0.999	0.985	4.86074e-80	1	HLA-C	CCL18+Macro
9.57137e-80	0.266198	1	0.995	3.13348e-75	1	S100A11	CCL18+Macro
2.27595e-72	0.288122	1	0.915	7.451e-68	1	CTSD	CCL18+Macro
5.78454e-72	0.279518	1	0.996	1.89374e-67	1	MT-ND2	CCL18+Macro
6.30062e-178	0.556745	0.989	0.682	2.0627e-173	2	GPNMB	CCL18+Macro
3.92381e-173	0.471072	0.942	0.563	1.28458e-168	2	LGMN	CCL18+Macro
2.72636e-171	0.743186	1	0.916	8.92556e-167	2	CTSD	CCL18+Macro
9.60672e-160	0.493546	0.988	0.852	3.14505e-155	2	CTSZ	CCL18+Macro
1.75146e-158	0.627003	1	0.958	5.73392e-154	2	CTSB	CCL18+Macro
4.75516e-153	0.750292	1	1	1.55675e-148	2	FTL	CCL18+Macro
1.50721e-141	0.636185	0.946	0.56	4.93431e-137	2	RNASE1	CCL18+Macro
6.93068e-138	0.511999	1	0.977	2.26897e-133	2	PSAP	CCL18+Macro
1.42457e-129	0.393529	1	0.913	4.66376e-125	2	CD68	CCL18+Macro
6.92555e-125	0.52115	0.986	0.72	2.26729e-120	2	CTSL	CCL18+Macro
1.6902e-105	0.71201	0.98	0.78	5.53337e-101	2	APOE	CCL18+Macro
7.69394e-103	0.469001	1	0.975	2.51884e-98	2	CSTB	CCL18+Macro
1.61787e-100	0.429109	0.992	0.856	5.29658e-96	2	LGALS3	CCL18+Macro
4.98838e-100	0.427879	0.995	0.946	1.63309e-95	2	GLUL	CCL18+Macro
5.64911e-100	0.715585	0.992	0.851	1.8494e-95	2	APOC1	CCL18+Macro
1.36097e-99	0.267972	0.44	0.125	4.45553e-95	2	CCL13	CCL18+Macro
1.62381e-84	0.383343	0.997	0.983	5.31602e-80	2	CD63	CCL18+Macro
2.17135e-78	0.326805	0.446	0.154	7.10855e-74	2	CCL2	CCL18+Macro
1.60294e-74	0.268737	0.933	0.742	5.24771e-70	2	ACP5	CCL18+Macro
7.68657e-68	0.406255	0.888	0.644	2.51643e-63	2	CCL18	CCL18+Macro
3.53421e-60	0.316825	0.842	0.514	1.15703e-55	2	NUPR1	CCL18+Macro
5.98856e-54	0.257686	1	0.984	1.96053e-49	2	LGALS1	CCL18+Macro
1.39851e-37	0.256063	0.934	0.788	4.57843e-33	2	FABP5	CCL18+Macro
5.75167e-15	0.286295	0.423	0.286	1.88298e-10	2	IFI27	CCL18+Macro
3.49925e-158	0.907667	0.424	0.065	1.14559e-153	3	CXCL10	C1QC+Macro
2.33265e-140	0.402404	0.43	0.076	7.63663e-136	3	CXCL9	C1QC+Macro
9.73318e-80	0.279889	0.855	0.576	3.18645e-75	3	VAMP5	C1QC+Macro
9.16771e-77	0.318831	0.737	0.396	3.00132e-72	3	FAM26F	C1QC+Macro
4.7482e-70	0.253695	0.596	0.295	1.55446e-65	3	GBP1	C1QC+Macro
7.92011e-66	0.432058	0.998	0.996	2.59288e-61	3	HLA-A	C1QC+Macro
2.83802e-61	0.318223	0.99	0.927	9.2911e-57	3	TYMP	C1QC+Macro
1.44744e-57	0.398778	0.817	0.578	4.73864e-53	3	IFITM3	C1QC+Macro
7.45782e-57	0.494773	0.882	0.634	2.44154e-52	3	C1QC	C1QC+Macro
9.44363e-56	0.298336	0.956	0.839	3.09166e-51	3	CTSC	C1QC+Macro
1.48912e-55	0.318411	0.9	0.695	4.87507e-51	3	CD14	C1QC+Macro
1.39488e-53	0.261781	0.91	0.79	4.56656e-49	3	PSME2	C1QC+Macro
6.29568e-43	0.470313	0.918	0.743	2.06108e-38	3	C1QA	C1QC+Macro
2.05232e-38	0.332409	1	1	6.71887e-34	3	B2M	C1QC+Macro
2.4177e-38	0.440103	0.908	0.721	7.91508e-34	3	C1QB	C1QC+Macro
3.53872e-37	0.311999	1	0.986	1.15851e-32	3	CD74	C1QC+Macro
2.0455e-30	0.25531	0.986	0.96	6.69657e-26	3	CTSB	C1QC+Macro
4.66086e-30	0.307765	1	0.953	1.52587e-25	3	HLA-DRB1	C1QC+Macro
9.46859e-28	0.67241	0.707	0.574	3.09983e-23	3	ISG15	C1QC+Macro
1.15611e-25	0.319018	0.797	0.63	3.78488e-21	3	IFI6	C1QC+Macro
1.07375e-23	0.260033	0.793	0.667	3.51523e-19	3	LY6E	C1QC+Macro
6.68132e-19	0.327488	0.745	0.592	2.18733e-14	3	RNASE1	C1QC+Macro
8.4125e-17	0.341271	0.992	0.934	2.75408e-12	3	LYZ	C1QC+Macro
3.56152e-16	0.338155	0.861	0.798	1.16597e-11	3	APOE	C1QC+Macro
3.20756e-12	0.397659	0.42	0.29	1.05009e-07	3	IFI27	C1QC+Macro
4.61321e-215	0.494431	0.865	0.23	1.51027e-210	4	FCN1	FCN1+Macro
3.73872e-158	0.498261	0.855	0.337	1.22398e-153	4	VCAN	FCN1+Macro
5.58201e-98	0.368824	1	0.994	1.82744e-93	4	H3F3A	FCN1+Macro
3.96661e-81	0.545602	0.973	0.876	1.29859e-76	4	FOS	FCN1+Macro
5.13212e-79	1.00072	0.956	0.825	1.68015e-74	4	S100A9	FCN1+Macro
6.69792e-65	0.324995	0.931	0.835	2.19277e-60	4	COTL1	FCN1+Macro
7.30873e-65	0.851931	0.889	0.649	2.39273e-60	4	S100A8	FCN1+Macro
3.14993e-64	0.400574	0.998	0.931	1.03122e-59	4	S100A4	FCN1+Macro
3.07539e-63	0.413495	1	1	1.00682e-58	4	ACTB	FCN1+Macro
2.85896e-62	0.671085	0.975	0.869	9.35967e-58	4	TIMP1	FCN1+Macro
3.0837e-54	0.433889	0.998	0.934	1.00954e-49	4	LYZ	FCN1+Macro
1.80289e-52	0.309343	1	0.936	5.90229e-48	4	AIF1	FCN1+Macro
4.21935e-52	0.275448	1	0.99	1.38133e-47	4	H3F3B	FCN1+Macro
1.54019e-51	0.282593	0.99	0.928	5.04229e-47	4	TYMP	FCN1+Macro
1.10058e-50	0.270074	1	0.995	3.60306e-46	4	SH3BGRL3	FCN1+Macro
1.50409e-49	0.315391	0.916	0.848	4.9241e-45	4	DUSP1	FCN1+Macro
5.41843e-44	0.282042	0.995	0.97	1.77389e-39	4	NEAT1	FCN1+Macro
1.36341e-43	0.250055	0.946	0.863	4.46354e-39	4	JUNB	FCN1+Macro
4.34435e-35	0.272806	0.877	0.769	1.42225e-30	4	ZFP36L1	FCN1+Macro
1.26613e-181	0.28096	0.726	0.161	4.14506e-177	5	RARRES1	CCL18+Macro
1.77005e-156	1.75099	0.985	0.649	5.79478e-152	5	CCL18	CCL18+Macro
1.05336e-143	0.56864	0.982	0.573	3.44849e-139	5	CFD	CCL18+Macro
9.48914e-134	0.265152	0.851	0.349	3.10656e-129	5	FUCA1	CCL18+Macro
4.49745e-121	0.522594	0.982	0.52	1.47238e-116	5	NUPR1	CCL18+Macro
2.82043e-118	1.09464	0.995	0.789	9.23352e-114	5	APOE	CCL18+Macro
2.50115e-113	0.320801	0.669	0.189	8.18828e-109	5	SEPP1	CCL18+Macro
3.60889e-102	0.876233	0.997	0.858	1.18148e-97	5	APOC1	CCL18+Macro
5.07187e-102	0.742037	0.995	0.718	1.66043e-97	5	C1QB	CCL18+Macro
1.24605e-101	0.323624	0.915	0.462	4.07933e-97	5	PLTP	CCL18+Macro
1.24306e-99	0.326999	0.956	0.614	4.06954e-95	5	PLD3	CCL18+Macro
1.82032e-95	0.505059	1	0.978	5.95935e-91	5	PSAP	CCL18+Macro
1.92308e-95	0.29613	0.869	0.423	6.29578e-91	5	PDK4	CCL18+Macro
6.86055e-94	0.376191	0.99	0.748	2.24601e-89	5	ACP5	CCL18+Macro
2.31687e-92	0.378559	0.954	0.581	7.58498e-88	5	LGMN	CCL18+Macro
2.59631e-92	0.260966	0.962	0.681	8.4998e-88	5	CD59	CCL18+Macro
2.83388e-88	0.636468	0.997	0.74	9.27755e-84	5	C1QA	CCL18+Macro
8.00015e-86	0.459757	0.992	0.631	2.61909e-81	5	C1QC	CCL18+Macro
1.03516e-85	0.308477	0.941	0.674	3.38891e-81	5	LIPA	CCL18+Macro
3.00726e-83	0.431109	1	0.697	9.84516e-79	5	GPNMB	CCL18+Macro
4.86476e-80	0.268726	0.974	0.693	1.59262e-75	5	MS4A4A	CCL18+Macro
2.05333e-79	0.321369	1	0.928	6.72219e-75	5	CTSS	CCL18+Macro
1.36281e-78	0.258253	0.995	0.844	4.46157e-74	5	ASAH1	CCL18+Macro
4.87473e-76	0.301377	0.979	0.756	1.59589e-71	5	MS4A7	CCL18+Macro
7.6138e-76	0.580888	1	1	2.49261e-71	5	FTL	CCL18+Macro
4.25962e-74	0.342694	0.997	0.838	1.39451e-69	5	CTSC	CCL18+Macro
2.29522e-64	0.25556	0.99	0.885	7.51409e-60	5	HLA-DMA	CCL18+Macro
3.28549e-64	0.584258	1	0.934	1.0756e-59	5	LYZ	CCL18+Macro
1.44737e-62	0.293638	0.979	0.774	4.7384e-58	5	MS4A6A	CCL18+Macro
3.40859e-61	0.478984	1	0.979	1.11591e-56	5	HLA-DRA	CCL18+Macro
6.43448e-57	0.329544	0.99	0.859	2.10652e-52	5	CTSZ	CCL18+Macro
1.19612e-55	0.438737	1	1	3.91587e-51	5	B2M	CCL18+Macro
3.38254e-55	0.413869	1	0.92	1.10738e-50	5	CTSD	CCL18+Macro
3.74841e-53	0.264638	1	0.966	1.22715e-48	5	ITM2B	CCL18+Macro
7.01119e-49	0.298046	1	0.884	2.29532e-44	5	HLA-DQA1	CCL18+Macro
2.23234e-48	0.457387	0.592	0.28	7.30822e-44	5	IFI27	CCL18+Macro
2.31095e-44	0.290898	0.977	0.886	7.5656e-40	5	TXNIP	CCL18+Macro
3.21824e-44	0.319369	1	0.96	1.05359e-39	5	CTSB	CCL18+Macro
2.36288e-38	0.267309	0.997	0.949	7.73559e-34	5	GLUL	CCL18+Macro
8.60287e-33	0.261508	1	0.962	2.81641e-28	5	HLA-DPA1	CCL18+Macro
1.04216e-32	0.276005	1	0.986	3.41182e-28	5	CD74	CCL18+Macro
0	0.430351	0.854	0.094	0	6	CD1C	cDC2
0	0.309363	0.711	0.069	0	6	CD1E	cDC2
2.07833e-264	0.440091	0.678	0.083	6.80405e-260	6	FCER1A	cDC2
4.1543e-223	0.354428	0.781	0.153	1.36003e-218	6	CST7	cDC2
1.8141e-204	0.281715	0.822	0.183	5.93901e-200	6	PKIB	cDC2
1.54478e-155	0.892924	1	0.964	5.05731e-151	6	HLA-DPB1	cDC2
1.61716e-154	0.885145	0.397	0.046	5.29427e-150	6	CCL17	cDC2
4.59457e-154	0.371541	0.824	0.268	1.50417e-149	6	CLEC10A	cDC2
1.23635e-148	0.830414	1	0.919	4.04756e-144	6	HLA-DQB1	cDC2
2.13334e-133	0.780208	1	0.962	6.98412e-129	6	HLA-DPA1	cDC2
7.39522e-130	0.682963	1	0.885	2.42105e-125	6	HLA-DQA1	cDC2
3.43832e-121	0.731815	0.997	0.954	1.12564e-116	6	HLA-DRB1	cDC2
1.10929e-118	0.669062	1	0.986	3.63158e-114	6	CD74	cDC2
1.4014e-117	0.344742	0.922	0.468	4.58791e-113	6	PPA1	cDC2
1.03899e-104	0.638334	1	0.979	3.40146e-100	6	HLA-DRA	cDC2
1.82191e-86	0.258219	0.838	0.425	5.96457e-82	6	AMICA1	cDC2
7.52019e-85	0.573721	0.954	0.827	2.46196e-80	6	HLA-DRB5	cDC2
1.6618e-72	0.404293	1	0.988	5.44039e-68	6	ACTG1	cDC2
2.17096e-66	0.388436	0.943	0.738	7.1073e-62	6	CXCR4	cDC2
2.21431e-65	0.303531	1	1	7.24921e-61	6	EEF1A1	cDC2
1.01277e-63	0.409255	0.97	0.746	3.31559e-59	6	RGS1	cDC2
2.91623e-62	0.250705	1	0.985	9.54714e-58	6	GNB2L1	cDC2
8.30584e-62	0.338568	0.951	0.834	2.71916e-57	6	COTL1	cDC2
2.62519e-61	0.480686	0.995	0.993	8.59435e-57	6	CST3	cDC2
9.72558e-61	0.252047	0.932	0.727	3.18396e-56	6	CKLF	cDC2
1.01411e-59	0.2517	0.892	0.565	3.32e-55	6	GPR183	cDC2
1.60087e-50	0.295284	0.449	0.154	5.24094e-46	6	S100B	cDC2
3.73826e-48	0.271376	0.995	0.904	1.22383e-43	6	TUBA1B	cDC2
1.55213e-46	0.360199	1	1	5.08137e-42	6	ACTB	cDC2
1.38624e-45	0.288297	1	1	4.53826e-41	6	TMSB10	cDC2
2.52981e-38	0.301721	0.822	0.648	8.28211e-34	6	YWHAH	cDC2
4.63323e-32	0.64874	0.835	0.704	1.51683e-27	6	C15orf48	cDC2
2.98855e-28	0.263935	0.97	0.923	9.7839e-24	6	LDHA	cDC2
3.01154e-27	0.25676	0.997	0.995	9.85919e-23	6	MALAT1	cDC2
0	3.8986	1	0.105	0	7	TPSAB1	Mast cell
0	1.95745	1	0.035	0	7	CPA3	Mast cell
0	1.00067	0.973	0.043	0	7	CLU	Mast cell
0	0.878047	0.99	0.083	0	7	HPGDS	Mast cell
0	0.649936	0.973	0.062	0	7	LTC4S	Mast cell
0	0.561944	0.935	0.008	0	7	GATA2	Mast cell
0	0.524501	0.918	0.019	0	7	SLC18A2	Mast cell
0	0.501943	0.918	0.013	0	7	KIT	Mast cell
0	0.49623	0.942	0.099	0	7	VWA5A	Mast cell
0	0.456268	0.825	0.014	0	7	RGS13	Mast cell
0	0.374369	0.89	0.007	0	7	RP11-354E11.2	Mast cell
0	0.304307	0.397	0.006	0	7	ADCYAP1	Mast cell
0	0.292682	0.76	0.018	0	7	C1orf186	Mast cell
0	0.276139	0.777	0.006	0	7	IL1RL1	Mast cell
0	0.272714	0.822	0.005	0	7	MAOB	Mast cell
0	0.257112	0.692	0.008	0	7	HDC	Mast cell
1.36318e-288	0.252103	0.805	0.105	4.46279e-284	7	LAT	Mast cell
5.64495e-274	0.767425	0.911	0.174	1.84804e-269	7	CD69	Mast cell
3.68933e-245	0.890185	0.863	0.169	1.20781e-240	7	HPGD	Mast cell
1.90341e-241	0.522092	0.339	0.011	6.23137e-237	7	CTSG	Mast cell
2.00083e-216	0.465262	0.901	0.225	6.55033e-212	7	SOCS1	Mast cell
1.35865e-183	0.720016	0.99	0.474	4.44795e-179	7	SAMSN1	Mast cell
3.68464e-161	0.320475	0.88	0.299	1.20628e-156	7	FOXP1	Mast cell
2.95352e-157	0.44779	0.979	0.503	9.66925e-153	7	RAC2	Mast cell
3.42828e-143	0.297438	0.555	0.093	1.12235e-138	7	AREG	Mast cell
4.22367e-140	0.526574	0.986	0.843	1.38274e-135	7	LAPTM4A	Mast cell
6.94857e-138	0.580523	0.983	0.551	2.27482e-133	7	IFITM2	Mast cell
7.63136e-137	1.00599	0.997	0.748	2.49835e-132	7	RGS1	Mast cell
2.48112e-133	0.605625	1	1	8.1227e-129	7	PTMA	Mast cell
8.5006e-131	1.17284	1	0.995	2.78293e-126	7	MALAT1	Mast cell
1.49313e-122	0.282286	0.726	0.215	4.88819e-118	7	TSC22D1	Mast cell
4.18025e-120	0.621971	1	1	1.36853e-115	7	EEF1A1	Mast cell
5.1847e-116	0.398269	0.815	0.372	1.69737e-111	7	NSMCE1	Mast cell
2.06235e-115	0.699229	0.962	0.58	6.75171e-111	7	RGS2	Mast cell
8.91693e-102	0.599983	0.962	0.738	2.91923e-97	7	ID2	Mast cell
4.82339e-95	0.330286	0.979	0.787	1.57908e-90	7	CD37	Mast cell
1.27058e-93	0.548951	0.986	0.779	4.15964e-89	7	CD9	Mast cell
1.55425e-93	0.330045	0.983	0.813	5.0883e-89	7	EIF3E	Mast cell
3.03464e-88	0.359631	1	0.998	9.9348e-84	7	FAU	Mast cell
3.4509e-85	0.427465	0.997	0.991	1.12975e-80	7	H3F3B	Mast cell
2.08235e-82	0.314418	0.973	0.859	6.81721e-78	7	FXYD5	Mast cell
6.71378e-81	0.430157	0.973	0.845	2.19796e-76	7	TSC22D3	Mast cell
1.83251e-80	0.285616	0.928	0.707	5.99926e-76	7	GLTSCR2	Mast cell
1.41375e-78	0.316022	0.986	0.912	4.62835e-74	7	HNRNPA1	Mast cell
6.8176e-77	0.275454	0.979	0.855	2.23195e-72	7	CCNI	Mast cell
1.21635e-75	0.427563	1	0.671	3.9821e-71	7	ALOX5AP	Mast cell
9.15294e-75	0.302726	0.997	0.987	2.99649e-70	7	NACA	Mast cell
2.34083e-71	0.347586	1	0.986	7.66341e-67	7	GNB2L1	Mast cell
3.95149e-70	0.30247	0.993	0.908	1.29364e-65	7	ARHGDIB	Mast cell
5.6816e-70	0.250861	0.894	0.693	1.86004e-65	7	EIF4A2	Mast cell
1.55836e-67	0.456264	1	0.994	5.10176e-63	7	SRGN	Mast cell
5.48862e-67	0.295003	0.908	0.759	1.79686e-62	7	PRDX6	Mast cell
6.26414e-64	0.371086	0.979	0.923	2.05076e-59	7	NDUFA4	Mast cell
1.67683e-60	0.401824	0.942	0.782	5.48962e-56	7	ZFP36	Mast cell
1.52826e-59	0.335451	0.986	0.883	5.00321e-55	7	ANXA1	Mast cell
3.62711e-51	0.270669	0.973	0.861	1.18744e-46	7	BTG1	Mast cell
2.46964e-48	0.25567	0.808	0.539	8.0851e-44	7	IER2	Mast cell
4.87806e-48	0.47546	0.959	0.83	1.59698e-43	7	CD52	Mast cell
7.62102e-47	0.307574	0.873	0.598	2.49497e-42	7	DDIT4	Mast cell
2.14635e-32	0.290592	0.918	0.812	7.02672e-28	7	NFKBIA	Mast cell
9.10809e-31	0.360551	0.911	0.867	2.98181e-26	7	JUNB	Mast cell
2.80732e-12	0.609506	0.411	0.28	9.19062e-08	7	IGLL5	Mast cell
2.48918e-58	0.339065	0.748	0.356	8.14909e-54	8	VCAN	FCN1+Macro
6.32002e-39	0.912564	0.966	0.872	2.06905e-34	8	TIMP1	FCN1+Macro
7.10684e-38	0.414112	0.932	0.812	2.32664e-33	8	PLIN2	FCN1+Macro
1.24913e-35	0.295424	0.936	0.717	4.08939e-31	8	FBP1	FCN1+Macro
9.00285e-34	0.278936	0.801	0.597	2.94735e-29	8	SLC2A3	FCN1+Macro
9.83146e-34	0.271033	1	0.995	3.21862e-29	8	SH3BGRL3	FCN1+Macro
3.83754e-33	0.404001	0.951	0.879	1.25634e-28	8	FOS	FCN1+Macro
5.44029e-33	0.404891	0.996	0.97	1.78104e-28	8	NEAT1	FCN1+Macro
4.77288e-30	0.27278	0.883	0.771	1.56255e-25	8	ZFP36L1	FCN1+Macro
2.42636e-26	0.40861	1	0.978	7.94341e-22	8	S100A10	FCN1+Macro
6.25952e-26	0.271901	1	0.996	2.04924e-21	8	S100A11	FCN1+Macro
2.56413e-22	0.2718	0.97	0.924	8.39446e-18	8	LDHA	FCN1+Macro
2.75002e-22	0.251727	0.883	0.786	9.00301e-18	8	ZFP36	FCN1+Macro
2.83985e-22	0.288895	0.887	0.655	9.2971e-18	8	S100A8	FCN1+Macro
1.59014e-21	0.282855	1	0.997	5.20579e-17	8	GAPDH	FCN1+Macro
3.06051e-19	0.26579	0.955	0.828	1.00195e-14	8	S100A9	FCN1+Macro
1.42242e-15	0.382242	0.361	0.179	4.65673e-11	8	CCL2	FCN1+Macro
1.31572e-14	0.27479	0.895	0.704	4.30741e-10	8	C15orf48	FCN1+Macro
1.96303e-12	0.250362	1	0.991	6.42658e-08	8	S100A6	FCN1+Macro
0.000924513	0.332107	0.677	0.655	1	8	SPP1	FCN1+Macro
1.96891e-66	0.664209	1	0.955	6.44583e-62	9	HLA-DRB1	C1QC+Macro
2.32146e-65	0.495947	1	0.993	7.59999e-61	9	CST3	C1QC+Macro
1.32468e-61	0.588851	1	0.987	4.33674e-57	9	CD74	C1QC+Macro
2.38182e-60	0.566944	1	0.965	7.79761e-56	9	HLA-DPB1	C1QC+Macro
5.95579e-55	0.380925	1	0.937	1.94981e-50	9	AIF1	C1QC+Macro
7.31371e-53	0.52554	1	0.963	2.39436e-48	9	HLA-DPA1	C1QC+Macro
1.72189e-52	0.432417	0.992	0.921	5.63713e-48	9	HLA-DQB1	C1QC+Macro
2.19412e-46	0.344204	0.992	0.778	7.1831e-42	9	MS4A6A	C1QC+Macro
3.09713e-46	0.261528	0.778	0.409	1.01394e-41	9	FAM26F	C1QC+Macro
1.81031e-39	0.403359	0.977	0.888	5.92659e-35	9	HLA-DQA1	C1QC+Macro
7.25225e-39	0.462231	1	0.98	2.37424e-34	9	HLA-DRA	C1QC+Macro
2.12828e-35	0.36168	0.916	0.703	6.96756e-31	9	CD14	C1QC+Macro
2.64769e-35	0.553227	0.9	0.644	8.668e-31	9	C1QC	C1QC+Macro
7.95642e-33	0.288219	0.824	0.635	2.60477e-28	9	HERPUD1	C1QC+Macro
2.44791e-27	0.300167	0.996	0.967	8.01396e-23	9	ITM2B	C1QC+Macro
1.98146e-23	0.379965	0.927	0.831	6.48691e-19	9	HLA-DRB5	C1QC+Macro
7.46769e-23	0.273959	0.904	0.754	2.44477e-18	9	RGS1	C1QC+Macro
1.05783e-22	0.414731	0.962	0.748	3.46314e-18	9	C1QA	C1QC+Macro
4.74831e-18	0.38936	0.927	0.728	1.5545e-13	9	C1QB	C1QC+Macro
1.06622e-253	1.16814	0.957	0.187	3.49058e-249	10	SEPP1	CCL18+Macro
6.14036e-222	0.613974	0.837	0.144	2.01023e-217	10	SLC40A1	CCL18+Macro
1.53859e-210	0.464596	0.915	0.196	5.03702e-206	10	FOLR2	CCL18+Macro
1.82194e-126	0.358281	0.636	0.129	5.96467e-122	10	F13A1	CCL18+Macro
5.21712e-123	0.794219	0.961	0.471	1.70798e-118	10	PLTP	CCL18+Macro
3.44807e-118	0.603803	0.647	0.138	1.12883e-113	10	CCL13	CCL18+Macro
3.29473e-97	0.557523	0.891	0.433	1.07863e-92	10	PDK4	CCL18+Macro
1.39286e-96	0.581566	0.969	0.584	4.55996e-92	10	CFD	CCL18+Macro
1.05499e-95	0.555922	0.996	0.778	3.45382e-91	10	MS4A6A	CCL18+Macro
4.00582e-86	0.521822	0.996	0.842	1.31143e-81	10	CTSC	CCL18+Macro
2.18053e-82	0.399932	0.996	0.699	7.13863e-78	10	MS4A4A	CCL18+Macro
8.67139e-82	0.512061	0.942	0.591	2.83884e-77	10	LGMN	CCL18+Macro
1.5252e-81	0.849039	0.969	0.588	4.9932e-77	10	RNASE1	CCL18+Macro
1.63017e-75	0.761966	1	0.747	5.33684e-71	10	C1QA	CCL18+Macro
9.46553e-70	0.324397	0.95	0.621	3.09882e-65	10	CD163	CCL18+Macro
1.53942e-65	0.699323	1	0.725	5.03975e-61	10	C1QB	CCL18+Macro
5.66217e-62	0.501004	1	0.639	1.85368e-57	10	C1QC	CCL18+Macro
1.30132e-61	0.264851	0.884	0.502	4.26026e-57	10	MARCKS	CCL18+Macro
1.64868e-61	1.40628	0.919	0.66	5.39744e-57	10	CCL18	CCL18+Macro
6.09812e-61	0.29366	0.915	0.623	1.9964e-56	10	DAB2	CCL18+Macro
3.50027e-60	0.394045	0.965	0.762	1.14592e-55	10	MS4A7	CCL18+Macro
1.08058e-58	0.412297	1	0.967	3.53759e-54	10	ITM2B	CCL18+Macro
2.39474e-52	0.302172	0.973	0.845	7.83991e-48	10	FCGRT	CCL18+Macro
6.11402e-52	0.251316	0.926	0.624	2.00161e-47	10	PLD3	CCL18+Macro
1.48113e-50	0.449027	0.992	0.862	4.84893e-46	10	CTSZ	CCL18+Macro
2.18815e-48	0.269915	0.922	0.696	7.16357e-44	10	TMEM176B	CCL18+Macro
2.98709e-45	0.50342	1	0.98	9.77914e-41	10	HLA-DRA	CCL18+Macro
2.80359e-44	0.474151	1	0.961	9.17839e-40	10	CTSB	CCL18+Macro
5.06153e-42	0.307659	0.953	0.702	1.65704e-37	10	CD14	CCL18+Macro
5.53781e-41	0.703319	0.969	0.795	1.81297e-36	10	APOE	CCL18+Macro
7.78177e-41	0.376624	0.996	0.887	2.5476e-36	10	HLA-DQA1	CCL18+Macro
1.8648e-36	0.3992	1	0.987	6.105e-32	10	CD74	CCL18+Macro
1.05527e-34	0.353431	1	0.963	3.45474e-30	10	HLA-DPA1	CCL18+Macro
1.33142e-34	0.390165	1	0.989	4.35882e-30	10	MT-ND3	CCL18+Macro
5.40478e-32	0.333591	1	0.95	1.76942e-27	10	GLUL	CCL18+Macro
7.50696e-31	0.272151	1	0.992	2.45763e-26	10	MT-ND1	CCL18+Macro
1.2119e-30	0.252669	1	0.965	3.9675e-26	10	HLA-DPB1	CCL18+Macro
1.2822e-29	0.257633	0.779	0.545	4.19768e-25	10	HMOX1	CCL18+Macro
1.9609e-29	0.291267	1	0.998	6.4196e-25	10	MT-CO1	CCL18+Macro
1.19225e-27	0.295519	1	0.978	3.9032e-23	10	PSAP	CCL18+Macro
1.28035e-27	0.252398	0.934	0.707	4.19161e-23	10	GPNMB	CCL18+Macro
1.01259e-19	0.320827	1	1	3.31503e-15	10	FTL	CCL18+Macro
7.73219e-16	0.45591	0.496	0.292	2.53136e-11	10	IFI27	CCL18+Macro
0	0.376948	0.758	0.014	0	12	IL22RA2	cDC2
2.22535e-238	0.64081	0.856	0.07	7.28535e-234	12	CD1A	cDC2
5.11359e-181	0.385847	0.5	0.026	1.67409e-176	12	CD207	cDC2
1.5599e-159	1.23412	0.985	0.182	5.1068e-155	12	LTB	cDC2
3.96226e-154	0.30959	0.894	0.132	1.29717e-149	12	NDRG2	cDC2
1.15305e-145	1.2119	0.917	0.156	3.77486e-141	12	S100B	cDC2
1.47544e-145	0.371494	0.356	0.016	4.83029e-141	12	FCGBP	cDC2
2.06339e-122	0.253748	0.735	0.096	6.75511e-118	12	CD1E	cDC2
4.52098e-114	0.468567	0.795	0.129	1.48008e-109	12	CD1C	cDC2
1.37316e-103	0.477509	0.879	0.209	4.49543e-99	12	PKIB	cDC2
3.25658e-86	0.62377	0.697	0.138	1.06614e-81	12	HLA-DQB2	cDC2
1.68988e-85	0.530747	0.652	0.11	5.53233e-81	12	FCER1A	cDC2
1.06053e-65	0.650713	1	0.857	3.47195e-61	12	LST1	cDC2
1.14785e-58	0.473111	0.97	0.486	3.75784e-54	12	PPA1	cDC2
1.53289e-57	0.439754	0.924	0.441	5.01838e-53	12	AMICA1	cDC2
4.10433e-56	0.649731	1	0.988	1.34368e-51	12	ACTG1	cDC2
1.56703e-54	0.40392	0.97	0.557	5.13014e-50	12	CORO1A	cDC2
9.20972e-53	0.287767	0.515	0.108	3.01508e-48	12	TACSTD2	cDC2
1.45298e-52	0.408616	0.985	0.672	4.75676e-48	12	GSN	cDC2
3.86128e-48	0.319597	0.955	0.641	1.26411e-43	12	VASP	cDC2
8.0576e-46	0.287832	0.962	0.748	2.6379e-41	12	GDI2	cDC2
1.2877e-45	0.347539	0.674	0.205	4.21567e-41	12	PLAC8	cDC2
9.53922e-43	0.45834	0.977	0.735	3.12295e-38	12	CKLF	cDC2
2.98903e-42	0.288176	0.992	0.878	9.78548e-38	12	HINT1	cDC2
1.37643e-41	0.586514	1	1	4.50617e-37	12	ACTB	cDC2
1.56917e-39	0.597062	1	0.923	5.13715e-35	12	HLA-DQB1	cDC2
1.19509e-37	0.33153	1	0.965	3.91248e-33	12	MYL12A	cDC2
1.25838e-34	0.274025	1	0.987	4.11968e-30	12	NACA	cDC2
1.28019e-33	0.328519	1	0.986	4.1911e-29	12	GNB2L1	cDC2
5.48401e-31	0.287477	0.992	0.91	1.79536e-26	12	ARHGDIB	cDC2
2.14697e-30	0.525902	1	0.89	7.02874e-26	12	HLA-DQA1	cDC2
1.06956e-29	0.255842	0.992	0.925	3.50151e-25	12	NPM1	cDC2
1.66251e-28	0.370177	1	1	5.44272e-24	12	EEF1A1	cDC2
4.37054e-26	0.320086	0.992	0.996	1.43083e-21	12	PFN1	cDC2
6.90106e-24	0.449611	1	0.987	2.25927e-19	12	CD74	cDC2
7.64047e-24	0.404448	1	0.966	2.50134e-19	12	HLA-DPB1	cDC2
3.06464e-23	0.434966	0.955	0.839	1.0033e-18	12	COTL1	cDC2
2.57562e-20	0.258741	1	0.991	8.43205e-16	12	H3F3B	cDC2
1.0299e-19	0.44747	1	0.956	3.37168e-15	12	HLA-DRB1	cDC2
2.65062e-19	0.488306	0.955	0.707	8.67759e-15	12	C15orf48	cDC2
3.04223e-18	0.352506	1	0.964	9.95965e-14	12	HLA-DPA1	cDC2
3.69967e-14	0.273757	0.947	0.909	1.2112e-09	12	TUBA1B	cDC2
2.39883e-12	0.308532	1	0.997	7.85329e-08	12	GAPDH	cDC2
2.79957e-12	0.319379	0.992	0.995	9.16522e-08	12	MALAT1	cDC2
1.4791e-10	0.280418	1	0.98	4.84227e-06	12	HLA-DRA	cDC2
1.89388e-10	0.250971	1	1	6.20019e-06	12	TMSB10	cDC2
3.57022e-10	0.272096	0.833	0.64	1.16882e-05	12	HERPUD1	cDC2
0.00100409	0.875509	0.288	0.175	1	12	HBB	cDC2
1.09457e-102	0.258695	0.716	0.112	3.5834e-98	13	POU2F2	FCN1+Macro
1.72235e-102	0.267804	0.724	0.115	5.63863e-98	13	LILRA5	FCN1+Macro
3.30856e-90	0.37714	0.802	0.166	1.08316e-85	13	CFP	FCN1+Macro
5.2213e-66	0.607625	0.871	0.263	1.70935e-61	13	FCN1	FCN1+Macro
1.49253e-61	1.03729	0.991	0.858	4.88625e-57	13	LST1	FCN1+Macro
4.65535e-61	0.305972	0.836	0.305	1.52407e-56	13	LILRB2	FCN1+Macro
9.54044e-59	0.795361	0.966	0.565	3.12335e-54	13	IFITM2	FCN1+Macro
3.84142e-56	0.408848	0.931	0.449	1.2576e-51	13	C10orf54	FCN1+Macro
4.27169e-54	0.470774	0.957	0.558	1.39847e-49	13	CORO1A	FCN1+Macro
7.23376e-51	0.290359	0.836	0.364	2.36819e-46	13	NAAA	FCN1+Macro
4.94929e-50	0.56825	0.948	0.624	1.6203e-45	13	RP11-290F20.3	FCN1+Macro
7.62059e-50	0.63142	1	0.939	2.49483e-45	13	AIF1	FCN1+Macro
4.4745e-48	0.543083	0.983	0.848	1.46486e-43	13	NAP1L1	FCN1+Macro
1.45254e-46	0.689864	0.957	0.84	4.75532e-42	13	COTL1	FCN1+Macro
3.2985e-46	0.319617	0.905	0.507	1.07986e-41	13	CD48	FCN1+Macro
9.62487e-43	0.564549	0.983	0.707	3.15099e-38	13	FCGR3A	FCN1+Macro
1.48698e-42	0.324457	0.879	0.417	4.86807e-38	13	FAM26F	FCN1+Macro
2.5331e-41	0.356172	0.931	0.713	8.29285e-37	13	PTPRC	FCN1+Macro
1.96494e-40	0.629244	1	0.995	6.43283e-36	13	SAT1	FCN1+Macro
2.11147e-40	0.320764	0.828	0.457	6.91254e-36	13	CYTIP	FCN1+Macro
3.74618e-39	0.397385	0.897	0.623	1.22643e-34	13	STXBP2	FCN1+Macro
1.15753e-38	0.343638	0.966	0.866	3.78953e-34	13	GMFG	FCN1+Macro
1.33925e-36	0.282047	0.888	0.468	4.38444e-32	13	FGL2	FCN1+Macro
1.49953e-36	0.483803	1	0.932	4.90918e-32	13	CTSS	FCN1+Macro
1.74821e-36	0.688608	0.991	0.935	5.72328e-32	13	S100A4	FCN1+Macro
4.70707e-36	0.454781	1	0.987	1.541e-31	13	NACA	FCN1+Macro
1.74377e-35	0.451669	1	0.996	5.70875e-31	13	EIF1	FCN1+Macro
3.52652e-35	0.39222	1	0.995	1.15451e-30	13	H3F3A	FCN1+Macro
5.72507e-35	0.496231	0.966	0.85	1.87427e-30	13	DUSP1	FCN1+Macro
2.39873e-32	0.320322	0.905	0.628	7.85296e-28	13	RHOB	FCN1+Macro
1.02693e-31	0.290839	0.897	0.605	3.36197e-27	13	BCL2A1	FCN1+Macro
2.06175e-31	0.257102	0.836	0.569	6.74975e-27	13	CARD16	FCN1+Macro
1.23649e-30	0.350022	0.974	0.936	4.04801e-26	13	PABPC1	FCN1+Macro
2.14853e-30	0.289712	0.879	0.659	7.03384e-26	13	TKT	FCN1+Macro
5.95971e-29	0.276726	0.828	0.648	1.95109e-24	13	WSB1	FCN1+Macro
8.73776e-29	0.385942	1	1	2.86057e-24	13	EEF1A1	FCN1+Macro
9.64895e-29	0.525057	0.957	0.835	3.15887e-24	13	CD52	FCN1+Macro
2.16304e-28	0.300639	1	0.995	7.08136e-24	13	PFDN5	FCN1+Macro
7.04841e-28	0.329356	0.983	0.813	2.30751e-23	13	SERPINA1	FCN1+Macro
1.20564e-27	0.327992	0.991	0.897	3.94701e-23	13	SLC25A6	FCN1+Macro
2.85753e-27	0.400903	0.94	0.748	9.35499e-23	13	CXCR4	FCN1+Macro
7.71684e-26	0.406629	0.966	0.881	2.52634e-21	13	FOS	FCN1+Macro
2.15921e-25	0.286723	1	0.989	7.06881e-21	13	ARPC3	FCN1+Macro
6.20671e-24	0.290404	0.957	0.911	2.03195e-19	13	ARHGDIB	FCN1+Macro
2.05787e-23	0.308633	0.983	0.957	6.73704e-19	13	HLA-E	FCN1+Macro
2.92026e-23	0.267763	0.879	0.77	9.56036e-19	13	PRELID1	FCN1+Macro
2.68973e-22	0.346605	1	0.981	8.80564e-18	13	FCER1G	FCN1+Macro
9.93073e-22	0.284921	0.853	0.594	3.25112e-17	13	RGS2	FCN1+Macro
1.18798e-20	0.484343	1	0.995	3.88921e-16	13	MALAT1	FCN1+Macro
1.40982e-20	0.278659	0.905	0.595	4.61547e-16	13	CFD	FCN1+Macro
2.16906e-20	0.350828	0.983	0.969	7.10105e-16	13	CALM2	FCN1+Macro
6.87737e-19	0.336327	1	0.971	2.25151e-14	13	NEAT1	FCN1+Macro
1.35052e-17	0.280367	0.914	0.851	4.42135e-13	13	TSC22D3	FCN1+Macro
2.70062e-17	0.314399	0.983	0.866	8.84128e-13	13	JUNB	FCN1+Macro
1.3728e-15	0.260788	0.94	0.768	4.49426e-11	13	MS4A7	FCN1+Macro
2.64285e-12	0.280857	0.776	0.595	8.65216e-08	13	IFITM3	FCN1+Macro
6.27401e-27	0.261369	0.394	0.083	2.05399e-22	14	CCL7	SPP1+Macro
4.48194e-15	0.402012	1	0.997	1.4673e-10	14	GAPDH	SPP1+Macro
6.30971e-14	0.678273	0.84	0.653	2.06567e-09	14	SPP1	SPP1+Macro
1.50298e-13	0.253013	0.989	0.989	4.92045e-09	14	YBX1	SPP1+Macro
2.38902e-12	0.259655	1	1	7.82118e-08	14	TMSB10	SPP1+Macro
4.20628e-12	0.294638	0.947	0.926	1.37705e-07	14	LDHA	SPP1+Macro
9.75202e-11	0.259815	0.989	0.995	3.19262e-06	14	SH3BGRL3	SPP1+Macro
1.20295e-10	0.400864	0.798	0.727	3.93822e-06	14	FBP1	SPP1+Macro
3.81932e-10	0.552723	0.713	0.498	1.25037e-05	14	FN1	SPP1+Macro
4.80493e-09	0.276901	1	0.986	0.000157304	14	LGALS1	SPP1+Macro
1.62242e-08	0.258137	1	0.979	0.000531147	14	S100A10	SPP1+Macro
2.44603e-08	0.300408	0.989	0.978	0.000800781	14	CSTB	SPP1+Macro
1.02142e-07	0.250593	0.894	0.786	0.00334393	14	MT2A	SPP1+Macro
1.19417e-07	0.263342	0.394	0.185	0.00390947	14	CCL2	SPP1+Macro
0.00208544	0.325226	1	1	1	14	FTL	SPP1+Macro
1.77978e-238	1.35972	0.803	0.032	5.82663e-234	15	MT1H	SPP1+Macro
1.4889e-160	0.546214	0.592	0.026	4.87437e-156	15	MT1M	SPP1+Macro
3.48705e-147	2.06741	0.986	0.101	1.14159e-142	15	MT1G	SPP1+Macro
1.87845e-84	0.587613	0.958	0.18	6.14969e-80	15	MT1F	SPP1+Macro
4.94519e-65	0.882881	0.915	0.21	1.61896e-60	15	MT1E	SPP1+Macro
4.58169e-55	1.62185	0.972	0.358	1.49995e-50	15	MT1X	SPP1+Macro
4.72684e-44	2.02416	1	0.785	1.54747e-39	15	MT2A	SPP1+Macro
1.39479e-23	1.26863	0.93	0.652	4.56626e-19	15	SPP1	SPP1+Macro
3.14418e-22	0.378408	0.972	0.743	1.02934e-17	15	MIF	SPP1+Macro
1.65635e-15	0.429692	1	0.986	5.42257e-11	15	LGALS1	SPP1+Macro
2.1993e-14	0.472035	1	0.997	7.20007e-10	15	GAPDH	SPP1+Macro
1.29369e-12	0.560349	1	0.978	4.23529e-08	15	CSTB	SPP1+Macro
4.6823e-11	0.290527	1	0.975	1.53289e-06	15	ALDOA	SPP1+Macro
6.01748e-10	0.348194	0.817	0.498	1.97e-05	15	FN1	SPP1+Macro
8.88696e-09	0.389655	0.887	0.602	0.000290941	15	RNASE1	SPP1+Macro
6.16392e-08	0.274889	1	0.979	0.00201794	15	S100A10	SPP1+Macro
3.41283e-06	0.271843	0.986	0.866	0.111729	15	APOC1	SPP1+Macro
3.51667e-82	0.296372	0.731	0.089	1.15129e-77	16	BAG3	SPP1+Macro
7.1449e-68	0.310374	0.776	0.122	2.3391e-63	16	SERPINH1	SPP1+Macro
6.69446e-48	0.943226	0.955	0.385	2.19163e-43	16	HSPH1	SPP1+Macro
1.09045e-43	0.344642	0.701	0.155	3.56993e-39	16	ZFAND2A	SPP1+Macro
1.02605e-41	1.41089	1	0.967	3.35907e-37	16	HSP90AA1	SPP1+Macro
5.08326e-36	1.24002	0.985	0.798	1.66416e-31	16	HSPB1	SPP1+Macro
7.35047e-32	0.384994	0.91	0.508	2.4064e-27	16	CACYBP	SPP1+Macro
5.1009e-31	0.7919	0.91	0.551	1.66993e-26	16	HSPD1	SPP1+Macro
7.03949e-31	1.56503	0.925	0.744	2.30459e-26	16	HSPA1A	SPP1+Macro
2.93183e-29	0.308013	0.731	0.255	9.59821e-25	16	FKBP4	SPP1+Macro
8.50589e-29	0.71574	0.97	0.77	2.78466e-24	16	HSPE1	SPP1+Macro
9.70246e-28	0.686342	0.657	0.2	3.17639e-23	16	HSPA6	SPP1+Macro
1.26947e-27	0.919348	0.896	0.547	4.15599e-23	16	DNAJB1	SPP1+Macro
2.60784e-26	0.632899	0.672	0.197	8.53756e-22	16	G0S2	SPP1+Macro
1.58527e-25	0.588073	0.97	0.88	5.18987e-21	16	HSP90AB1	SPP1+Macro
2.09824e-24	0.659422	1	0.997	6.86923e-20	16	GAPDH	SPP1+Macro
7.84631e-23	0.666477	1	0.709	2.56873e-18	16	C15orf48	SPP1+Macro
5.68105e-22	0.295716	0.791	0.306	1.85986e-17	16	IL1RN	SPP1+Macro
9.68061e-22	0.644261	0.866	0.505	3.16924e-17	16	HSPA1B	SPP1+Macro
5.76803e-21	0.542237	0.985	0.925	1.88834e-16	16	LDHA	SPP1+Macro
2.43638e-19	0.592206	0.955	0.832	7.97622e-15	16	HSPA8	SPP1+Macro
9.1514e-19	0.596027	0.985	0.755	2.99598e-14	16	SOD2	SPP1+Macro
1.42466e-17	0.648783	1	0.978	4.66404e-13	16	CSTB	SPP1+Macro
2.13418e-16	0.269631	0.881	0.647	6.98688e-12	16	UPP1	SPP1+Macro
2.19421e-16	0.311573	0.94	0.743	7.18342e-12	16	MIF	SPP1+Macro
3.7302e-16	0.346267	0.985	0.948	1.22119e-11	16	TPI1	SPP1+Macro
7.18879e-16	0.362155	0.881	0.619	2.35347e-11	16	DNAJA1	SPP1+Macro
1.61043e-15	0.992112	0.925	0.653	5.27223e-11	16	SPP1	SPP1+Macro
5.76087e-15	0.490937	1	0.986	1.88599e-10	16	LGALS1	SPP1+Macro
1.54604e-14	0.397595	0.985	0.996	5.06141e-10	16	EIF1	SPP1+Macro
1.50413e-13	0.295235	0.866	0.608	4.92421e-09	16	BCL2A1	SPP1+Macro
6.78365e-13	0.506454	0.97	0.887	2.22083e-08	16	ANXA1	SPP1+Macro
3.01199e-12	0.299727	1	0.975	9.86065e-08	16	ALDOA	SPP1+Macro
6.31935e-12	0.366023	0.567	0.236	2.06883e-07	16	MMP9	SPP1+Macro
1.6348e-11	0.326527	1	0.979	5.352e-07	16	S100A10	SPP1+Macro
2.83384e-11	0.509006	1	0.995	9.27743e-07	16	VIM	SPP1+Macro
1.11379e-10	0.426969	0.567	0.268	3.64632e-06	16	IL8	SPP1+Macro
5.90763e-08	0.359953	1	1	0.00193404	16	FTH1	SPP1+Macro
8.79479e-07	0.557751	0.91	0.968	0.0287924	16	UBB	SPP1+Macro
0.000181685	0.504984	0.896	0.876	1	16	TIMP1	SPP1+Macro
0.000344472	0.397468	1	0.962	1	16	UBC	SPP1+Macro
0.000373898	0.50909	0.866	0.787	1	16	MT2A	SPP1+Macro
0.00112745	0.254758	0.985	0.995	1	16	SAT1	SPP1+Macro
0	1.07564	0.708	0.009	0	17	TCL1A	pDC
0	0.673173	0.969	0.007	0	17	LILRA4	pDC
0	0.63097	0.969	0.023	0	17	CXCR3	pDC
0	0.381515	0.831	0.003	0	17	LRRC26	pDC
0	0.306803	0.846	0.005	0	17	SMPD3	pDC
0	0.295947	0.862	0.009	0	17	MAP1A	pDC
1.14859e-266	0.84894	0.938	0.038	3.76024e-262	17	CLIC3	pDC
4.85501e-257	0.425852	0.862	0.032	1.58943e-252	17	DERL3	pDC
3.2856e-232	0.355224	0.831	0.033	1.07564e-227	17	SPIB	pDC
1.19143e-199	0.267567	0.662	0.023	3.9005e-195	17	LAMP5	pDC
3.40852e-194	0.265955	0.738	0.032	1.11588e-189	17	IRF4	pDC
1.22238e-174	0.45078	0.938	0.065	4.00183e-170	17	MZB1	pDC
3.55981e-168	0.494644	0.969	0.074	1.16541e-163	17	C12orf75	pDC
2.17717e-156	0.639967	0.969	0.082	7.12762e-152	17	TSPAN13	pDC
2.09218e-152	0.260512	0.877	0.064	6.84939e-148	17	BCL11A	pDC
3.26522e-143	1.91735	0.985	0.096	1.06897e-138	17	GZMB	pDC
6.15704e-143	0.337683	0.646	0.034	2.01569e-138	17	FUT7	pDC
3.07158e-137	0.603343	0.985	0.098	1.00557e-132	17	PLD4	pDC
4.43726e-123	0.75615	0.969	0.11	1.45267e-118	17	ITM2C	pDC
1.09754e-122	0.278671	0.677	0.045	3.59314e-118	17	TPM2	pDC
3.14984e-120	0.286477	0.877	0.083	1.0312e-115	17	SELL	pDC
1.24316e-114	0.423735	0.923	0.105	4.06985e-110	17	PTPRCAP	pDC
6.21539e-96	1.48441	0.554	0.038	2.03479e-91	17	PTGDS	pDC
3.846e-94	0.560011	0.985	0.163	1.2591e-89	17	TCF4	pDC
1.81215e-78	0.994293	1	0.206	5.9326e-74	17	PLAC8	pDC
1.95469e-73	0.536938	1	0.228	6.39927e-69	17	UGCG	pDC
9.30075e-70	1.30297	0.985	0.244	3.04488e-65	17	IGJ	pDC
6.94556e-67	0.956521	1	0.277	2.27384e-62	17	IRF7	pDC
6.8311e-66	0.292317	0.846	0.159	2.23637e-61	17	CYB561A3	pDC
1.37292e-53	0.47543	0.923	0.28	4.49467e-49	17	CCDC50	pDC
2.5005e-52	0.493704	0.969	0.329	8.18614e-48	17	CLN8	pDC
7.67649e-52	0.466745	0.969	0.29	2.51313e-47	17	SERPINF1	pDC
1.09098e-51	0.405752	0.892	0.244	3.57164e-47	17	PPP1R14B	pDC
2.04567e-49	0.733803	0.985	0.399	6.69712e-45	17	IRF8	pDC
1.09757e-46	0.343721	0.923	0.305	3.59323e-42	17	APP	pDC
8.0616e-46	0.344167	0.754	0.168	2.63921e-41	17	PMAIP1	pDC
4.09425e-42	0.731492	1	0.881	1.34037e-37	17	SEC61B	pDC
9.04725e-40	0.408641	0.892	0.342	2.96189e-35	17	C9orf142	pDC
1.74684e-39	1.11331	1	0.749	5.71881e-35	17	CXCR4	pDC
1.41876e-36	0.486714	0.738	0.214	4.64475e-32	17	SOX4	pDC
3.53835e-36	0.47132	0.877	0.351	1.15839e-31	17	BTG2	pDC
7.38572e-36	0.443788	0.738	0.195	2.41794e-31	17	LTB	pDC
7.98987e-34	0.555749	1	0.64	2.61572e-29	17	HERPUD1	pDC
8.16717e-34	0.649897	0.954	0.615	2.67377e-29	17	ZFP36L2	pDC
9.81092e-34	0.491408	0.985	0.74	3.2119e-29	17	SPCS1	pDC
2.86005e-32	0.372344	0.985	0.815	9.36322e-28	17	PARK7	pDC
4.57429e-31	0.263497	0.938	0.421	1.49753e-26	17	STMN1	pDC
2.747e-30	0.336197	0.985	0.7	8.99313e-26	17	ERP29	pDC
3.00348e-30	0.715064	1	0.582	9.83279e-26	17	GPR183	pDC
1.21461e-29	0.337221	0.985	0.598	3.97638e-25	17	PLP2	pDC
1.27154e-28	0.5648	1	0.987	4.16278e-24	17	NACA	pDC
8.18374e-28	0.564357	1	1	2.67919e-23	17	EEF1A1	pDC
1.61188e-27	0.908799	1	0.995	5.27697e-23	17	MALAT1	pDC
4.15692e-27	0.354652	1	0.976	1.36089e-22	17	SRP14	pDC
1.07848e-26	0.346757	1	0.921	3.53072e-22	17	SSR4	pDC
2.7452e-25	0.364019	1	0.879	8.98722e-21	17	HINT1	pDC
5.74791e-24	0.317558	0.969	0.688	1.88175e-19	17	RNASE6	pDC
7.27979e-24	0.501279	1	0.685	2.38326e-19	17	ALOX5AP	pDC
2.09839e-22	0.311994	1	0.872	6.86971e-18	17	EEF2	pDC
3.89286e-22	0.289808	0.923	0.681	1.27445e-17	17	UCP2	pDC
7.67911e-20	0.339612	0.938	0.882	2.51399e-15	17	COMMD6	pDC
5.29363e-19	0.331569	1	0.986	1.73303e-14	17	GNB2L1	pDC
7.58751e-19	0.273292	0.985	0.893	2.484e-14	17	DDX5	pDC
3.15314e-17	0.376267	0.908	0.609	1.03227e-12	17	DDIT4	pDC
1.12782e-16	0.287658	1	0.998	3.69227e-12	17	FAU	pDC
8.34311e-16	0.289869	1	0.915	2.73137e-11	17	HNRNPA1	pDC
9.34597e-16	0.30066	0.969	0.931	3.05968e-11	17	EEF1B2	pDC
1.23089e-15	0.464344	0.954	0.788	4.02969e-11	17	ZFP36	pDC
2.45152e-15	0.25428	0.985	0.9	8.0258e-11	17	SUB1	pDC
4.57363e-14	0.257531	1	0.965	1.49731e-09	17	MYL12A	pDC
4.95771e-14	0.293481	1	0.995	1.62306e-09	17	CYBA	pDC
6.48687e-14	0.252678	1	0.97	2.12367e-09	17	EEF1D	pDC
6.48072e-13	0.297365	1	1	2.12166e-08	17	TPT1	pDC
1.5468e-09	0.277679	1	0.991	5.06392e-05	17	H3F3B	pDC
0	0.935945	0.906	0.027	0	18	CCR7	LAMP3+DC
0	0.883999	0.703	0.01	0	18	CCL19	LAMP3+DC
2.29992e-230	0.55546	0.938	0.045	7.52947e-226	18	LAMP3	LAMP3+DC
1.23824e-134	0.73583	0.906	0.082	4.05374e-130	18	FSCN1	LAMP3+DC
9.63145e-130	0.327476	0.641	0.036	3.15314e-125	18	EBI3	LAMP3+DC
1.57442e-89	1.30746	0.969	0.163	5.15432e-85	18	BIRC3	LAMP3+DC
4.91808e-83	1.61393	0.656	0.062	1.61008e-78	18	CCL17	LAMP3+DC
1.2219e-82	0.421025	0.797	0.1	4.00027e-78	18	DUSP4	LAMP3+DC
1.08881e-80	0.301072	0.484	0.033	3.56456e-76	18	C10orf10	LAMP3+DC
9.27253e-79	0.260805	0.781	0.101	3.03564e-74	18	KIF2A	LAMP3+DC
3.03003e-73	0.869302	0.984	0.212	9.9197e-69	18	MARCKSL1	LAMP3+DC
4.59359e-70	0.257661	0.938	0.174	1.50385e-65	18	DAPP1	LAMP3+DC
2.24249e-65	1.02948	0.641	0.076	7.34147e-61	18	CCL22	LAMP3+DC
3.26691e-58	0.455067	0.531	0.057	1.06952e-53	18	IDO1	LAMP3+DC
2.98209e-42	0.312601	0.562	0.093	9.76278e-38	18	GADD45A	LAMP3+DC
2.0555e-41	0.351568	0.844	0.256	6.72931e-37	18	NUB1	LAMP3+DC
1.27376e-37	0.346599	0.906	0.331	4.17003e-33	18	CSF2RA	LAMP3+DC
1.00123e-35	0.28322	0.859	0.305	3.27782e-31	18	GRSF1	LAMP3+DC
5.61089e-34	0.881098	1	0.866	1.83689e-29	18	BTG1	LAMP3+DC
1.04719e-33	0.281514	0.797	0.253	3.42831e-29	18	ANXA6	LAMP3+DC
3.51957e-33	0.576632	0.984	0.492	1.15224e-28	18	PPA1	LAMP3+DC
1.67421e-32	1.00122	1	1	5.48102e-28	18	EEF1A1	LAMP3+DC
2.78788e-31	0.280287	0.75	0.223	9.12697e-27	18	IL32	LAMP3+DC
4.03767e-29	0.297968	0.922	0.469	1.32185e-24	18	CFLAR	LAMP3+DC
1.27351e-28	0.647226	0.969	0.763	4.16923e-24	18	LSP1	LAMP3+DC
2.03827e-28	0.281674	0.875	0.422	6.67289e-24	18	STK4	LAMP3+DC
2.27215e-28	0.328511	0.891	0.451	7.43858e-24	18	RASSF4	LAMP3+DC
2.34764e-26	0.457839	0.969	0.711	7.68571e-22	18	PNRC1	LAMP3+DC
6.60732e-26	0.370351	0.859	0.443	2.1631e-21	18	BASP1	LAMP3+DC
2.87499e-25	0.344519	0.656	0.189	9.41216e-21	18	CST7	LAMP3+DC
3.57174e-24	0.537466	1	0.996	1.16932e-19	18	EIF1	LAMP3+DC
5.27476e-24	1.3033	1	0.995	1.72685e-19	18	MALAT1	LAMP3+DC
1.20516e-23	0.584747	0.984	0.944	3.94545e-19	18	GSTP1	LAMP3+DC
5.26979e-23	0.585143	1	1	1.72522e-18	18	TMSB10	LAMP3+DC
2.98052e-22	0.270327	0.844	0.396	9.75763e-18	18	CDKN1A	LAMP3+DC
6.14239e-22	0.488439	0.953	0.829	2.01089e-17	18	ZFAS1	LAMP3+DC
1.37655e-21	1.14428	0.984	0.91	4.50656e-17	18	TXN	LAMP3+DC
1.46364e-21	0.294294	0.922	0.496	4.79165e-17	18	SAMSN1	LAMP3+DC
1.75593e-21	0.696998	0.984	0.758	5.74856e-17	18	RGS1	LAMP3+DC
1.56454e-20	0.374832	0.969	0.88	5.122e-16	18	HINT1	LAMP3+DC
3.15419e-18	0.38824	0.984	0.849	1.03262e-13	18	NAP1L1	LAMP3+DC
4.89191e-18	0.424002	0.797	0.399	1.60151e-13	18	IL7R	LAMP3+DC
1.4189e-17	0.362081	0.75	0.374	4.64519e-13	18	CD83	LAMP3+DC
3.41951e-16	0.290456	0.844	0.496	1.11948e-11	18	TUBA1C	LAMP3+DC
1.46384e-14	0.26305	0.938	0.676	4.79233e-10	18	GSN	LAMP3+DC
1.64744e-14	0.482068	1	0.988	5.39337e-10	18	ACTG1	LAMP3+DC
1.79578e-13	0.28123	1	0.976	5.87901e-09	18	GPX4	LAMP3+DC
7.44419e-13	0.391302	0.938	0.817	2.43708e-08	18	NFKBIA	LAMP3+DC
1.47938e-12	0.250663	0.984	0.9	4.84318e-08	18	SUB1	LAMP3+DC
7.11431e-12	0.366127	1	1	2.32908e-07	18	TMSB4X	LAMP3+DC
9.65061e-12	0.412783	0.938	0.747	3.15942e-07	18	ID2	LAMP3+DC
2.61935e-11	0.290893	1	0.986	8.57521e-07	18	GNB2L1	LAMP3+DC
2.77688e-11	0.447162	1	0.999	9.09094e-07	18	HLA-B	LAMP3+DC
2.8448e-10	0.294754	0.922	0.75	9.3133e-06	18	CXCR4	LAMP3+DC
5.39634e-10	0.376294	1	0.986	1.76665e-05	18	HLA-C	LAMP3+DC
5.93439e-09	0.265488	1	0.962	0.00019428	18	UBC	LAMP3+DC
7.36797e-09	0.316014	0.703	0.584	0.000241212	18	TMEM176A	LAMP3+DC
9.61466e-07	0.483489	1	1	0.0314765	18	ACTB	LAMP3+DC
2.31314e-06	0.311828	1	1	0.0757275	18	B2M	LAMP3+DC
1.88063e-05	0.319178	1	0.996	0.61568	18	HLA-A	LAMP3+DC
0.000204284	0.312431	1	0.987	1	18	CD74	LAMP3+DC
0.00176031	0.353652	0.984	0.967	1	18	HLA-DPB1	LAMP3+DC
0.00273697	0.250968	0.969	0.892	1	18	HLA-DQA1	LAMP3+DC
0	0.416526	0.945	0.001	0	19	CLEC9A	cDC1
7.02675e-247	0.345035	0.745	0.02	2.30042e-242	19	DNASE1L3	cDC1
1.87824e-146	0.403218	0.891	0.054	6.14897e-142	19	IDO1	cDC1
4.70242e-61	0.256344	0.891	0.143	1.53948e-56	19	CCND1	cDC1
1.09047e-54	0.405334	0.964	0.254	3.56998e-50	19	CPNE3	cDC1
2.08561e-50	0.265794	0.727	0.112	6.82787e-46	19	TACSTD2	cDC1
3.08276e-50	0.637326	0.982	0.271	1.00923e-45	19	LGALS2	cDC1
2.46144e-44	0.554775	0.982	0.359	8.05826e-40	19	C1orf54	cDC1
2.44653e-43	0.611817	1	0.4	8.00944e-39	19	IRF8	cDC1
5.02047e-40	0.992189	1	0.555	1.6436e-35	19	CPVL	cDC1
8.39828e-38	0.493302	0.945	0.368	2.74943e-33	19	NAAA	cDC1
4.72935e-37	0.862597	1	0.922	1.5483e-32	19	SNX3	cDC1
5.74032e-37	0.265122	0.982	0.313	1.87927e-32	19	LIMD2	cDC1
2.50575e-35	1.84276	1	0.993	8.20333e-31	19	CST3	cDC1
1.52465e-34	0.341457	0.927	0.343	4.99141e-30	19	TAP1	cDC1
1.31269e-33	0.73271	0.727	0.168	4.29747e-29	19	S100B	cDC1
1.43747e-33	0.255407	0.8	0.189	4.70601e-29	19	CST7	cDC1
1.76225e-33	1.06256	1	0.987	5.76924e-29	19	CD74	cDC1
2.08428e-32	0.347816	0.891	0.292	6.82353e-28	19	SERPINF1	cDC1
3.45123e-32	1.06423	1	0.965	1.12986e-27	19	HLA-DPA1	cDC1
9.33929e-32	1.21174	1	0.966	3.0575e-27	19	HLA-DPB1	cDC1
2.57558e-30	0.683972	1	1	8.43192e-26	19	TMSB4X	cDC1
1.13262e-29	0.464629	1	0.79	3.70797e-25	19	RGS10	cDC1
8.81586e-29	0.537775	1	0.763	2.88614e-24	19	LSP1	cDC1
1.16896e-26	0.382575	1	0.779	3.82695e-22	19	PPT1	cDC1
5.72134e-26	0.371218	1	0.9	1.87305e-21	19	SUB1	cDC1
1.9542e-25	0.305932	1	0.472	6.39765e-21	19	FGL2	cDC1
2.14445e-25	0.318199	1	0.493	7.02051e-21	19	PPA1	cDC1
3.55651e-25	0.471564	1	0.931	1.16433e-20	19	EEF1B2	cDC1
3.75458e-25	0.855779	1	0.957	1.22918e-20	19	HLA-DRB1	cDC1
7.81171e-25	0.487037	1	0.849	2.5574e-20	19	NAP1L1	cDC1
8.1353e-25	0.277474	0.873	0.432	2.66333e-20	19	RAB32	cDC1
3.23564e-24	0.708326	1	0.924	1.05928e-19	19	HLA-DQB1	cDC1
8.75968e-24	0.714182	1	0.891	2.86774e-19	19	HLA-DQA1	cDC1
1.71953e-22	0.558301	0.982	0.747	5.62939e-18	19	ID2	cDC1
3.72122e-21	0.302567	1	0.617	1.21825e-16	19	PSMB9	cDC1
1.31807e-20	0.427106	1	0.944	4.31509e-16	19	GSTP1	cDC1
1.23429e-17	0.552208	1	1	4.04081e-13	19	ACTB	cDC1
4.34637e-17	0.544879	1	0.988	1.42291e-12	19	ACTG1	cDC1
1.15343e-16	0.362658	0.855	0.465	3.7761e-12	19	RGCC	cDC1
1.89293e-16	0.562513	1	0.98	6.19706e-12	19	HLA-DRA	cDC1
2.46847e-16	0.424173	1	0.999	8.08127e-12	19	HLA-B	cDC1
1.52735e-15	0.302356	1	0.936	5.00024e-11	19	PABPC1	cDC1
7.37346e-14	0.270468	1	0.986	2.41392e-09	19	GNB2L1	cDC1
2.34747e-13	0.252865	1	0.898	7.68516e-09	19	SLC25A6	cDC1
1.03432e-12	0.256635	0.673	0.313	3.38615e-08	19	VMO1	cDC1
2.68623e-12	0.299978	1	0.986	8.7942e-08	19	HLA-C	cDC1
2.30923e-05	0.440179	0.836	0.835	0.755996	19	HLA-DRB5	cDC1
1.31576e-42	0.26547	0.773	0.121	4.30753e-38	20	KRT19	CCL18+Macro
7.15697e-11	0.254688	0.886	0.707	2.34305e-06	20	NBEAL1	CCL18+Macro
1.00444e-10	0.289036	0.977	0.744	3.28835e-06	20	MIF	CCL18+Macro
7.75559e-10	0.261824	0.75	0.298	2.53903e-05	20	IFI27	CCL18+Macro
1.4844e-09	0.421229	1	0.989	4.85962e-05	20	MT-ND3	CCL18+Macro
2.30098e-08	0.278993	1	0.997	0.000753294	20	MT-ND4	CCL18+Macro
3.14037e-08	0.441489	1	0.925	0.0010281	20	CTSD	CCL18+Macro
2.54506e-07	0.276104	1	1	0.00833203	20	TMSB10	CCL18+Macro
3.52862e-06	0.355573	0.955	0.75	0.11552	20	CTSL	CCL18+Macro
1.27003e-05	0.250475	0.977	0.992	0.415782	20	MT-CYB	CCL18+Macro
1.43713e-05	0.277043	0.977	0.963	0.470488	20	CTSB	CCL18+Macro
3.62239e-05	0.261192	1	0.996	1	20	MT-CO3	CCL18+Macro
0.00267813	0.262632	1	1	1	20	FTL	CCL18+Macro
1.24418e-78	0.302186	0.8	0.05	4.07321e-74	21	KIAA0101	C1QC+Macro
1.18265e-40	0.385654	0.833	0.119	3.87176e-36	21	PTTG1	C1QC+Macro
7.2859e-38	0.347724	0.6	0.059	2.38526e-33	21	UBE2C	C1QC+Macro
4.00443e-28	0.32761	0.967	0.245	1.31097e-23	21	CKS1B	C1QC+Macro
4.3155e-21	0.845657	0.967	0.424	1.41281e-16	21	STMN1	C1QC+Macro
2.0496e-19	0.791614	1	0.897	6.70998e-15	21	HMGB1	C1QC+Macro
4.10874e-18	0.711149	1	0.796	1.34512e-13	21	H2AFZ	C1QC+Macro
5.43274e-18	0.821611	0.967	0.494	1.77857e-13	21	HMGB2	C1QC+Macro
5.58452e-18	0.80788	1	0.847	1.82826e-13	21	HMGN2	C1QC+Macro
1.1648e-14	0.424422	0.933	0.627	3.81331e-10	21	H2AFV	C1QC+Macro
7.15675e-14	0.329777	0.967	0.672	2.34298e-09	21	NUCKS1	C1QC+Macro
9.3648e-14	0.317868	0.567	0.128	3.06585e-09	21	HPGDS	C1QC+Macro
5.06167e-13	0.660233	1	0.909	1.65709e-08	21	TUBA1B	C1QC+Macro
8.1555e-12	0.586039	1	1	2.66995e-07	21	PTMA	C1QC+Macro
3.99183e-10	0.472848	1	0.829	1.30684e-05	21	TUBB	C1QC+Macro
5.10921e-10	0.655093	0.4	0.084	1.67265e-05	21	CPA3	C1QC+Macro
5.56561e-09	0.295356	0.667	0.309	0.000182207	21	CKS2	C1QC+Macro
2.53919e-07	1.21203	0.467	0.15	0.00831279	21	TPSAB1	C1QC+Macro
3.06872e-06	0.252543	0.967	0.88	0.100464	21	HINT1	C1QC+Macro
4.21577e-06	0.286795	1	0.967	0.138016	21	UBB	C1QC+Macro
4.23053e-06	0.279599	0.867	0.749	0.138499	21	ARL6IP1	C1QC+Macro
1.37663e-05	0.250362	0.933	0.748	0.45068	21	ID2	C1QC+Macro
1.65925e-05	0.341731	1	0.996	0.543204	21	MT-CO2	C1QC+Macro
3.20281e-05	0.268336	0.967	0.687	1	21	ALOX5AP	C1QC+Macro
4.14066e-05	0.319657	1	0.997	1	21	MT-ND4	C1QC+Macro
0.00014779	0.540097	1	0.986	1	21	LGALS1	C1QC+Macro
0.000206717	0.288114	1	0.991	1	21	H3F3B	C1QC+Macro
0.000822727	0.250087	1	0.969	1	21	CALM2	C1QC+Macro
0.00264195	0.511259	0.367	0.204	1	21	HPGD	C1QC+Macro
0.00344994	0.301719	0.733	0.585	1	21	ISG15	C1QC+Macro
Note
Macro: Macrophage; DC: dendritic cell; cDC1:type 1 conventional DC; cDC2: type 2 conventional DC; pDC: plasmacytoid DC

## Sheet: Validation Single-Cell Data 1
Supplementary Table 3. Differentially Expressed Genes among Myeloid clusters in the Validation Single-Cell Data 1
p_val	avg_logFC	pct.1	pct.2	p_val_adj	cluster	gene	cell_type
1.15027e-158	0.68218	0.662	0.354	4.81514e-154	0	EREG	SPP1+Macro
1.8907e-156	0.266295	0.369	0.088	7.91465e-152	0	FCN1	SPP1+Macro
1.24419e-137	0.651983	0.634	0.334	5.20832e-133	0	TIMP1	SPP1+Macro
3.04168e-127	0.423126	0.518	0.227	1.27328e-122	0	VCAN	SPP1+Macro
4.65364e-119	0.492016	0.895	0.759	1.94806e-114	0	PLAUR	SPP1+Macro
1.04868e-102	0.541117	0.555	0.277	4.38988e-98	0	G0S2	SPP1+Macro
8.09912e-102	0.394286	0.635	0.398	3.39037e-97	0	PPIF	SPP1+Macro
8.2262e-84	0.390308	0.793	0.662	3.44357e-79	0	BTG1	SPP1+Macro
4.48597e-78	0.398154	0.751	0.571	1.87787e-73	0	SLC2A3	SPP1+Macro
5.17212e-76	0.317823	0.419	0.197	2.1651e-71	0	DUSP4	SPP1+Macro
4.06243e-75	0.313708	0.837	0.726	1.70057e-70	0	SH3BGRL3	SPP1+Macro
6.3846e-70	0.37695	0.665	0.483	2.67266e-65	0	OLR1	SPP1+Macro
2.56663e-65	0.530682	0.551	0.345	1.07442e-60	0	IL1RN	SPP1+Macro
2.1013e-61	0.375827	0.665	0.468	8.79624e-57	0	ALOX5AP	SPP1+Macro
1.99223e-60	0.32311	0.944	0.9	8.33966e-56	0	SRGN	SPP1+Macro
2.82506e-56	0.800688	0.604	0.423	1.1826e-51	0	IL1B	SPP1+Macro
4.68918e-53	0.276698	0.745	0.634	1.96294e-48	0	S100A10	SPP1+Macro
5.48544e-52	0.284548	0.814	0.743	2.29626e-47	0	MCL1	SPP1+Macro
3.45396e-48	0.27796	0.818	0.748	1.44586e-43	0	GAPDH	SPP1+Macro
2.28719e-47	0.259791	0.715	0.602	9.57439e-43	0	CD44	SPP1+Macro
8.8717e-46	0.37794	0.398	0.227	3.71378e-41	0	CCL20	SPP1+Macro
2.16535e-43	0.320319	0.839	0.761	9.06437e-39	0	SOD2	SPP1+Macro
6.46937e-42	0.294838	0.455	0.297	2.70814e-37	0	AREG	SPP1+Macro
2.05405e-41	0.347484	0.845	0.789	8.59845e-37	0	MALAT1	SPP1+Macro
1.14058e-40	0.290821	0.72	0.603	4.77458e-36	0	BASP1	SPP1+Macro
5.35202e-39	0.395039	0.619	0.464	2.24041e-34	0	CXCL3	SPP1+Macro
1.84734e-37	0.332499	0.661	0.532	7.73317e-33	0	CXCL2	SPP1+Macro
1.53819e-35	0.287265	0.342	0.195	6.439e-31	0	INHBA	SPP1+Macro
7.48102e-31	0.460357	0.545	0.392	3.13163e-26	0	SPP1	SPP1+Macro
3.90603e-29	0.508901	0.71	0.61	1.6351e-24	0	CXCL8	SPP1+Macro
9.5689e-17	0.27509	0.365	0.272	4.00564e-12	0	THBS1	SPP1+Macro
8.0688e-141	0.571536	0.885	0.527	3.37768e-136	1	APOC1	CCL18+Macro
2.22839e-132	0.635696	0.944	0.664	9.32826e-128	1	APOE	CCL18+Macro
5.28283e-101	0.801744	0.351	0.101	2.21145e-96	1	CHIT1	CCL18+Macro
1.26437e-97	0.421697	0.992	0.93	5.29278e-93	1	CTSD	CCL18+Macro
1.99898e-95	0.392235	0.999	0.99	8.36792e-91	1	FTL	CCL18+Macro
1.85564e-93	0.358454	0.981	0.932	7.76791e-89	1	PSAP	CCL18+Macro
6.92395e-91	0.431026	0.953	0.797	2.89843e-86	1	GPNMB	CCL18+Macro
1.14161e-84	0.334323	0.847	0.587	4.77889e-80	1	ACP5	CCL18+Macro
1.74901e-83	0.363005	0.818	0.548	7.32155e-79	1	LIPA	CCL18+Macro
7.34356e-79	0.293801	0.867	0.618	3.07409e-74	1	GM2A	CCL18+Macro
3.93529e-55	0.453335	0.718	0.436	1.64735e-50	1	CCL18	CCL18+Macro
3.39124e-53	0.259083	0.962	0.873	1.41961e-48	1	GRN	CCL18+Macro
2.44714e-31	0.339922	0.978	0.938	1.0244e-26	1	MTRNR2L12	CCL18+Macro
4.52235e-31	0.347174	0.999	0.985	1.8931e-26	1	MT-RNR2	CCL18+Macro
6.98803e-303	0.883159	0.784	0.206	2.92526e-298	2	SELENOP	CCL18+Macro
8.01942e-302	0.972966	0.751	0.198	3.35701e-297	2	F13A1	CCL18+Macro
4.67498e-228	1.00091	0.887	0.459	1.95699e-223	2	PLTP	CCL18+Macro
2.16096e-211	0.484041	0.569	0.134	9.04598e-207	2	SLC40A1	CCL18+Macro
1.94483e-184	0.487233	0.684	0.239	8.14126e-180	2	FOLR2	CCL18+Macro
5.87485e-144	0.450087	0.472	0.125	2.45927e-139	2	CCL13	CCL18+Macro
5.91759e-138	0.58698	0.957	0.672	2.47716e-133	2	C1QA	CCL18+Macro
9.79751e-122	0.612321	0.839	0.455	4.10134e-117	2	RNASE1	CCL18+Macro
4.57377e-90	0.406708	0.997	0.961	1.91463e-85	2	CD74	CCL18+Macro
1.87641e-81	0.333352	0.798	0.552	7.85486e-77	2	SLCO2B1	CCL18+Macro
7.34054e-77	0.394758	0.921	0.634	3.07282e-72	2	C1QB	CCL18+Macro
6.9925e-70	0.337485	0.837	0.662	2.92713e-65	2	FCGRT	CCL18+Macro
4.9451e-66	0.299882	0.614	0.343	2.07007e-61	2	FUCA1	CCL18+Macro
3.89306e-64	0.344441	0.859	0.72	1.62967e-59	2	ITM2B	CCL18+Macro
5.93394e-61	0.332626	0.777	0.523	2.48401e-56	2	LGMN	CCL18+Macro
2.45268e-60	0.999643	0.672	0.449	1.02672e-55	2	CCL18	CCL18+Macro
5.0628e-54	0.262508	0.707	0.487	2.11934e-49	2	MS4A6A	CCL18+Macro
9.30349e-53	0.30813	0.994	0.94	3.89453e-48	2	HLA-DRB1	CCL18+Macro
3.92564e-51	0.289155	0.927	0.791	1.64331e-46	2	HLA-DPB1	CCL18+Macro
5.68451e-50	0.290033	0.789	0.611	2.37959e-45	2	CD163	CCL18+Macro
1.71889e-47	0.267795	0.801	0.631	7.19543e-43	2	TMEM176B	CCL18+Macro
1.76812e-37	0.251597	0.639	0.42	7.40153e-33	2	C1QC	CCL18+Macro
6.83332e-36	0.295281	0.795	0.676	2.8605e-31	2	CTSZ	CCL18+Macro
2.09786e-33	0.265498	0.75	0.605	8.78185e-29	2	ZNF331	CCL18+Macro
1.47405e-31	0.252616	0.942	0.836	6.17053e-27	2	HLA-DPA1	CCL18+Macro
2.6585e-29	0.330283	0.667	0.492	1.11287e-24	2	FOS	CCL18+Macro
2.03108e-163	0.742016	0.826	0.373	8.5023e-159	3	EGR1	CCL18+Macro
2.09468e-145	0.787226	0.686	0.239	8.76854e-141	3	CCL4	CCL18+Macro
2.11107e-120	0.549091	0.613	0.224	8.83714e-116	3	CCL3	CCL18+Macro
1.18601e-115	0.636079	0.87	0.527	4.96474e-111	3	JUN	CCL18+Macro
2.30358e-108	0.476372	0.746	0.382	9.64301e-104	3	IER2	CCL18+Macro
3.83137e-108	0.609054	0.889	0.579	1.60385e-103	3	IER3	CCL18+Macro
6.27457e-100	0.350703	0.359	0.087	2.6266e-95	3	CCL3L3	CCL18+Macro
6.55065e-88	0.305981	0.315	0.073	2.74217e-83	3	TNF	CCL18+Macro
7.60579e-88	0.354496	0.767	0.416	3.18386e-83	3	NFKBIZ	CCL18+Macro
1.69271e-86	0.548366	0.793	0.424	7.08586e-82	3	IL1B	CCL18+Macro
6.71337e-83	0.579242	0.798	0.483	2.81028e-78	3	FOS	CCL18+Macro
9.31799e-80	0.512883	0.885	0.603	3.9006e-75	3	CXCL8	CCL18+Macro
5.91918e-74	0.328406	0.824	0.524	2.47783e-69	3	PPP1R15A	CCL18+Macro
6.63436e-72	0.422513	0.324	0.092	2.77721e-67	3	CCL4L2	CCL18+Macro
6.40809e-70	0.568279	0.898	0.683	2.68249e-65	3	APOE	CCL18+Macro
2.12326e-68	0.429483	0.849	0.611	8.88818e-64	3	CD83	CCL18+Macro
2.78412e-68	0.253118	0.676	0.359	1.16546e-63	3	DUSP2	CCL18+Macro
1.75458e-66	0.275752	0.576	0.243	7.34486e-62	3	SELENOP	CCL18+Macro
2.13271e-66	0.300426	0.73	0.408	8.92773e-62	3	GADD45B	CCL18+Macro
1.37464e-65	0.456011	0.785	0.514	5.7544e-61	3	TNFAIP3	CCL18+Macro
2.1749e-65	0.318245	0.808	0.52	9.10435e-61	3	DNAJB1	CCL18+Macro
1.86536e-60	0.366132	0.805	0.532	7.80859e-56	3	CXCL2	CCL18+Macro
6.3927e-60	0.415016	0.901	0.668	2.67605e-55	3	HSPA1A	CCL18+Macro
4.13825e-58	0.386911	0.927	0.77	1.73231e-53	3	NFKBIA	CCL18+Macro
1.32714e-57	0.357781	0.873	0.665	5.55553e-53	3	FOSB	CCL18+Macro
1.7164e-56	0.418631	0.839	0.612	7.18504e-52	3	ZFP36	CCL18+Macro
1.06754e-52	0.267708	0.73	0.45	4.46882e-48	3	ATF3	CCL18+Macro
4.98773e-51	0.333206	0.914	0.751	2.08792e-46	3	JUNB	CCL18+Macro
1.78904e-48	0.313202	0.784	0.505	7.48909e-44	3	HSPA1B	CCL18+Macro
8.52225e-47	0.720849	0.714	0.451	3.5675e-42	3	CCL18	CCL18+Macro
4.8131e-45	0.364971	0.715	0.472	2.01481e-40	3	CXCL3	CCL18+Macro
1.30747e-38	0.295287	0.823	0.655	5.47321e-34	3	DUSP1	CCL18+Macro
5.97686e-38	0.273994	0.876	0.647	2.50197e-33	3	C1QB	CCL18+Macro
8.45517e-36	0.293134	0.88	0.687	3.53942e-31	3	C1QA	CCL18+Macro
8.96155e-36	0.264078	0.844	0.649	3.75139e-31	3	NR4A2	CCL18+Macro
8.52441e-34	0.266206	0.754	0.537	3.5684e-29	3	MAFB	CCL18+Macro
1.30744e-33	0.251814	0.727	0.488	5.47306e-29	3	PLTP	CCL18+Macro
1.20376e-28	0.288285	0.914	0.809	5.03907e-24	3	GPNMB	CCL18+Macro
3.94688e-11	0.377344	0.992	0.991	1.6522e-06	4	FTL	CCL18+Macro
4.46753e-172	1.44163	0.958	0.669	1.87015e-167	5	HSPA1A	SPP1+Macro
1.47022e-156	0.704652	0.653	0.189	6.15449e-152	5	BAG3	SPP1+Macro
3.62744e-134	1.22012	0.873	0.505	1.51848e-129	5	HSPA1B	SPP1+Macro
3.20757e-133	0.950757	0.842	0.467	1.34272e-128	5	HSPH1	SPP1+Macro
1.04329e-129	1.06849	0.93	0.742	4.36733e-125	5	HSP90AA1	SPP1+Macro
1.15974e-129	1.13867	0.864	0.523	4.85478e-125	5	DNAJB1	SPP1+Macro
1.43653e-119	0.359489	0.367	0.064	6.01346e-115	5	ZFAND2A	SPP1+Macro
1.6943e-97	0.712215	0.736	0.399	7.0925e-93	5	HSPD1	SPP1+Macro
1.74797e-85	0.878449	0.497	0.171	7.31719e-81	5	HSPA6	SPP1+Macro
4.38932e-85	0.93049	0.785	0.527	1.83741e-80	5	HSPB1	SPP1+Macro
2.76433e-68	0.330999	0.325	0.085	1.15718e-63	5	SERPINH1	SPP1+Macro
1.5351e-45	0.460399	0.84	0.699	6.4261e-41	5	HSP90AB1	SPP1+Macro
7.79376e-45	0.451893	0.554	0.312	3.26255e-40	5	IER5	SPP1+Macro
8.3434e-41	0.34553	0.538	0.319	3.49263e-36	5	HSPE1	SPP1+Macro
8.19594e-38	0.280398	0.415	0.191	3.4309e-33	5	DNAJA4	SPP1+Macro
5.96537e-34	0.453165	0.846	0.756	2.49716e-29	5	GAPDH	SPP1+Macro
4.63191e-30	0.436071	0.888	0.794	1.93897e-25	5	MALAT1	SPP1+Macro
6.54949e-29	0.657181	0.618	0.409	2.74168e-24	5	SPP1	SPP1+Macro
1.0877e-27	0.425996	0.807	0.732	4.55322e-23	5	HSPA8	SPP1+Macro
1.96039e-24	0.359171	0.688	0.494	8.2064e-20	5	ALOX5AP	SPP1+Macro
1.70066e-23	0.440011	0.51	0.319	7.11915e-19	5	G0S2	SPP1+Macro
3.48507e-23	0.414792	0.705	0.572	1.45889e-18	5	KLF6	SPP1+Macro
6.6673e-12	0.26647	0.73	0.671	2.791e-07	5	UBC	SPP1+Macro
7.25247e-11	0.250686	0.681	0.587	3.03596e-06	5	PLIN2	SPP1+Macro
2.72988e-10	0.262878	0.655	0.584	1.14276e-05	5	HSPA5	SPP1+Macro
1.38067e-08	0.263347	0.53	0.452	0.000577964	5	HMOX1	SPP1+Macro
4.78644e-08	0.483008	0.468	0.389	0.00200365	5	TIMP1	SPP1+Macro
4.86608e-08	0.366114	0.576	0.507	0.00203699	5	RGS1	SPP1+Macro
4.16237e-06	0.266678	0.457	0.381	0.174241	5	IL1RN	SPP1+Macro
2.02066e-05	0.294248	0.613	0.556	0.845868	5	JUN	SPP1+Macro
0	0.632423	0.626	0.009	0	6	FABP4	CCL18+Macro
3.75882e-203	0.501966	0.723	0.117	1.57348e-198	6	LPL	CCL18+Macro
3.33125e-121	0.692911	0.893	0.393	1.3945e-116	6	MARCO	CCL18+Macro
3.28669e-92	0.42229	0.777	0.346	1.37584e-87	6	ALDH2	CCL18+Macro
1.85358e-81	0.888659	0.679	0.245	7.75926e-77	6	FN1	CCL18+Macro
4.6251e-80	0.829257	0.981	0.878	1.93612e-75	6	LYZ	CCL18+Macro
5.19831e-69	0.399361	0.789	0.411	2.17606e-64	6	SERPINA1	CCL18+Macro
7.85777e-67	0.39007	0.613	0.204	3.28934e-62	6	INHBA	CCL18+Macro
4.83429e-64	0.343139	0.792	0.396	2.02368e-59	6	LTA4H	CCL18+Macro
2.47253e-62	0.394723	0.714	0.341	1.03503e-57	6	SERPING1	CCL18+Macro
4.5192e-61	0.478828	0.796	0.414	1.89178e-56	6	CD52	CCL18+Macro
1.49156e-60	0.542748	0.934	0.655	6.24383e-56	6	C1QB	CCL18+Macro
9.2757e-60	0.281658	0.733	0.352	3.8829e-55	6	ALOX5	CCL18+Macro
4.85426e-59	0.418974	0.871	0.508	2.03204e-54	6	TXNIP	CCL18+Macro
2.0547e-52	0.264448	0.689	0.331	8.60118e-48	6	ABCG1	CCL18+Macro
2.22669e-51	0.426471	0.824	0.512	9.32115e-47	6	VSIG4	CCL18+Macro
4.29412e-50	0.348737	0.645	0.298	1.79756e-45	6	SCD	CCL18+Macro
3.54599e-46	0.391568	0.981	0.905	1.48439e-41	6	MT-ND2	CCL18+Macro
8.02149e-45	0.340211	0.921	0.776	3.35787e-40	6	UBB	CCL18+Macro
2.055e-43	0.301737	0.846	0.49	8.60245e-39	6	ALOX5AP	CCL18+Macro
1.06325e-42	0.364506	0.909	0.666	4.45086e-38	6	MRC1	CCL18+Macro
1.36666e-40	0.389777	0.947	0.693	5.72098e-36	6	C1QA	CCL18+Macro
2.4211e-40	0.349963	0.969	0.881	1.0135e-35	6	GRN	CCL18+Macro
7.85055e-40	0.387099	0.987	0.964	3.28632e-35	6	MT-ND1	CCL18+Macro
2.05494e-39	0.444058	0.997	0.986	8.60218e-35	6	MT-RNR2	CCL18+Macro
4.22366e-37	0.37859	0.871	0.562	1.76807e-32	6	APOC1	CCL18+Macro
1.16197e-36	0.352984	0.969	0.945	4.86412e-32	6	MT-CO1	CCL18+Macro
9.22526e-35	0.338869	0.972	0.936	3.86178e-30	6	MT-ND3	CCL18+Macro
1.31937e-33	0.295254	0.997	0.982	5.52303e-29	6	MT-ATP6	CCL18+Macro
3.84368e-33	0.324562	0.956	0.904	1.609e-28	6	MT-CYB	CCL18+Macro
9.57306e-33	0.277194	0.997	0.974	4.00738e-28	6	MT-ND4	CCL18+Macro
1.86744e-32	0.317585	0.984	0.964	7.81727e-28	6	MT-CO3	CCL18+Macro
1.2969e-29	0.367258	0.978	0.942	5.42895e-25	6	MTRNR2L12	CCL18+Macro
3.45538e-28	0.333565	0.956	0.914	1.44646e-23	6	MT-RNR1	CCL18+Macro
1.84857e-25	0.254952	0.83	0.613	7.73828e-21	6	ACP5	CCL18+Macro
5.79937e-13	0.27865	0.739	0.541	2.42768e-08	6	HLA-DRB5	CCL18+Macro
3.19814e-196	0.647035	0.34	0.019	1.33877e-191	7	MMP7	SPP1+Macro
1.53697e-156	1.14634	0.596	0.1	6.43391e-152	7	CHI3L1	SPP1+Macro
3.47513e-77	0.927878	0.408	0.083	1.45472e-72	7	MMP12	SPP1+Macro
5.97604e-67	1.25827	0.826	0.405	2.50163e-62	7	SPP1	SPP1+Macro
1.38513e-45	0.356504	0.426	0.134	5.79831e-41	7	LPL	SPP1+Macro
1.56438e-44	0.900259	0.606	0.286	6.54864e-40	7	MMP9	SPP1+Macro
1.43704e-40	0.438016	0.713	0.373	6.01558e-36	7	IFI6	SPP1+Macro
2.59937e-36	0.465642	0.755	0.518	1.08812e-31	7	GSN	SPP1+Macro
2.77692e-35	0.416109	0.883	0.735	1.16245e-30	7	ITGB2	SPP1+Macro
4.63613e-31	0.347067	0.695	0.412	1.94073e-26	7	FABP5	SPP1+Macro
1.24776e-30	0.274248	0.603	0.293	5.22325e-26	7	LY6E	SPP1+Macro
3.19865e-24	0.317831	0.691	0.421	1.33899e-19	7	CD52	SPP1+Macro
4.46674e-23	0.337729	0.933	0.812	1.86982e-18	7	ANXA2	SPP1+Macro
3.17517e-22	0.31563	0.837	0.645	1.32916e-17	7	GM2A	SPP1+Macro
1.3162e-17	0.262319	0.837	0.678	5.50974e-13	7	CALR	SPP1+Macro
1.13361e-08	0.284681	0.397	0.261	0.000474541	7	FN1	SPP1+Macro
9.08571e-180	0.799777	0.432	0.038	3.80337e-175	8	CXCL10	STAT1+Macro
5.01741e-140	1.1335	0.535	0.085	2.10034e-135	8	CXCL9	STAT1+Macro
1.58534e-47	0.423	0.491	0.182	6.63638e-43	8	GBP1	STAT1+Macro
1.04545e-42	0.347568	0.299	0.074	4.37638e-38	8	C3	STAT1+Macro
6.01299e-26	0.302508	0.594	0.364	2.5171e-21	8	STAT1	STAT1+Macro
2.83389e-19	0.350389	0.926	0.845	1.1863e-14	8	HLA-DPA1	STAT1+Macro
7.12404e-19	0.336035	0.978	0.955	2.98219e-14	8	HLA-DRA	STAT1+Macro
1.91122e-18	0.313525	0.985	0.965	8.00058e-14	8	CD74	STAT1+Macro
2.19076e-18	0.28069	0.494	0.294	9.17076e-14	8	WARS	STAT1+Macro
2.04944e-17	0.468471	0.697	0.504	8.57914e-13	8	RGS1	STAT1+Macro
2.90198e-14	0.368956	0.601	0.407	1.2148e-09	8	HLA-DQA1	STAT1+Macro
4.00293e-13	0.360083	0.613	0.456	1.67567e-08	8	PLEK	STAT1+Macro
5.03935e-11	0.250372	0.875	0.804	2.10952e-06	8	HLA-DPB1	STAT1+Macro
4.61636e-10	0.25249	0.694	0.544	1.93246e-05	8	HLA-DRB5	STAT1+Macro
6.43257e-10	0.26567	0.771	0.62	2.69274e-05	8	RGS2	STAT1+Macro
4.28392e-08	0.260926	0.834	0.774	0.00179329	8	SOD2	STAT1+Macro
3.21237e-56	0.465861	0.903	0.44	1.34473e-51	9	IL1B	CCL18+Macro
8.85947e-45	0.375126	0.618	0.246	3.70866e-40	9	CCL20	CCL18+Macro
4.19359e-34	0.348969	0.749	0.402	1.75548e-29	9	EREG	CCL18+Macro
2.42058e-33	0.369777	0.959	0.778	1.01328e-28	9	NFKBIA	CCL18+Macro
3.11229e-32	0.344171	0.813	0.482	1.30284e-27	9	CXCL3	CCL18+Macro
3.05246e-29	0.383471	0.88	0.597	1.27779e-24	9	IER3	CCL18+Macro
4.20901e-27	0.265539	0.816	0.528	1.76193e-22	9	TNFAIP3	CCL18+Macro
9.77518e-26	0.288421	0.895	0.619	4.09199e-21	9	CXCL8	CCL18+Macro
1.0544e-24	0.319086	0.869	0.565	4.41384e-20	9	APOC1	CCL18+Macro
4.02087e-23	0.321521	0.981	0.937	1.68318e-18	9	PSAP	CCL18+Macro
5.88599e-20	0.337432	0.929	0.694	2.46393e-15	9	APOE	CCL18+Macro
1.34239e-15	0.253999	0.494	0.282	5.61939e-11	9	THBS1	CCL18+Macro
1.90979e-15	0.263386	0.94	0.814	7.99457e-11	9	GPNMB	CCL18+Macro
0	0.361891	0.519	0.011	0	10	MKI67	SPP1+Macro
1.05649e-185	0.291393	0.568	0.054	4.42257e-181	10	CKS1B	SPP1+Macro
4.01371e-86	0.553297	0.704	0.213	1.68018e-81	10	STMN1	SPP1+Macro
1.46029e-79	0.509892	0.684	0.206	6.11291e-75	10	HMGB2	SPP1+Macro
1.8764e-71	0.294305	0.432	0.082	7.85481e-67	10	HIST1H4C	SPP1+Macro
4.50986e-67	0.959337	0.883	0.578	1.88787e-62	10	TUBB	SPP1+Macro
1.17994e-65	0.892053	0.951	0.746	4.93933e-61	10	TUBA1B	SPP1+Macro
3.41244e-65	0.501661	0.714	0.291	1.42848e-60	10	H2AFZ	SPP1+Macro
6.58498e-63	0.640266	0.85	0.48	2.75654e-58	10	HMGN2	SPP1+Macro
2.5323e-50	0.57088	0.816	0.5	1.06005e-45	10	HMGB1	SPP1+Macro
1.12209e-35	0.468647	0.908	0.757	4.69719e-31	10	PTMA	SPP1+Macro
4.58425e-27	0.255858	0.597	0.308	1.91901e-22	10	ANP32B	SPP1+Macro
1.14413e-24	0.351759	0.985	0.948	4.78943e-20	10	RPL41	SPP1+Macro
1.62374e-22	0.396595	0.835	0.617	6.79713e-18	10	COTL1	SPP1+Macro
8.08939e-21	0.325767	0.777	0.499	3.3863e-16	10	ALOX5AP	SPP1+Macro
2.24936e-20	0.288101	0.752	0.535	9.41606e-16	10	EEF1B2	SPP1+Macro
2.433e-19	0.274396	0.869	0.685	1.01848e-14	10	RPL36A	SPP1+Macro
1.17305e-18	0.25581	0.66	0.419	4.91052e-14	10	PEA15	SPP1+Macro
2.35428e-17	0.308489	0.796	0.638	9.85526e-13	10	ENO1	SPP1+Macro
4.40984e-16	0.295437	0.922	0.853	1.846e-11	10	RPS11	SPP1+Macro
4.88947e-13	0.264068	0.908	0.843	2.04678e-08	10	RPS29	SPP1+Macro
5.10484e-13	0.268267	0.85	0.759	2.13694e-08	10	GAPDH	SPP1+Macro
1.06311e-11	0.283087	0.845	0.761	4.45029e-07	10	RPS23	SPP1+Macro
4.27981e-06	0.274684	0.641	0.508	0.179157	10	RGS1	SPP1+Macro
4.08741e-198	0.488053	0.574	0.05	1.71103e-193	11	IFIT1	STAT1+Macro
2.57312e-126	0.356492	0.497	0.06	1.07713e-121	11	IFIT2	STAT1+Macro
3.01184e-113	0.597978	0.716	0.155	1.26079e-108	11	ISG15	STAT1+Macro
1.10581e-93	0.634099	0.731	0.197	4.62902e-89	11	MX1	STAT1+Macro
7.26622e-77	0.291534	0.401	0.063	3.04171e-72	11	RSAD2	STAT1+Macro
6.26579e-71	0.728067	0.853	0.374	2.62292e-66	11	IFI6	STAT1+Macro
6.5991e-67	0.293292	0.558	0.135	2.76245e-62	11	IFI44L	STAT1+Macro
2.26764e-62	0.46321	0.675	0.231	9.49258e-58	11	IFIT3	STAT1+Macro
6.96048e-60	0.524347	0.746	0.292	2.91373e-55	11	LY6E	STAT1+Macro
1.05235e-39	0.505108	0.726	0.362	4.40524e-35	11	IFITM3	STAT1+Macro
1.98122e-26	0.280159	0.67	0.365	8.29357e-22	11	STAT1	STAT1+Macro
4.20465e-21	0.404052	0.685	0.392	1.76011e-16	11	SDS	STAT1+Macro
1.89373e-19	0.320209	0.812	0.642	7.92733e-15	11	TYMP	STAT1+Macro
7.54048e-17	0.335412	0.98	0.937	3.15652e-12	11	CTSD	STAT1+Macro
1.28094e-10	0.322096	0.685	0.507	5.36216e-06	11	RGS1	STAT1+Macro
2.55938e-10	0.328035	0.706	0.549	1.07138e-05	11	LGMN	STAT1+Macro
9.21474e-10	0.329029	0.848	0.724	3.85738e-05	11	CTSL	STAT1+Macro
3.11564e-09	0.563789	0.609	0.417	0.000130424	11	SPP1	STAT1+Macro
3.43919e-06	0.352391	0.635	0.497	0.143968	11	RNASE1	STAT1+Macro
2.12365e-287	0.329869	0.405	0.008	8.8898e-283	12	MT1H	SPP1+Macro
2.73029e-261	1.62047	0.863	0.067	1.14293e-256	12	MT1G	SPP1+Macro
2.22456e-121	0.723524	0.649	0.083	9.31223e-117	12	MT1X	SPP1+Macro
4.20985e-91	0.497687	0.542	0.074	1.76229e-86	12	MT1F	SPP1+Macro
5.54751e-73	0.252473	0.405	0.048	2.32224e-68	12	MT1E	SPP1+Macro
1.14918e-65	1.51024	0.916	0.446	4.81056e-61	12	MT2A	SPP1+Macro
1.48699e-11	0.558193	0.687	0.418	6.2247e-07	12	SPP1	SPP1+Macro
1.5444e-06	0.28717	0.649	0.54	0.0646503	12	TGFBI	SPP1+Macro
6.02436e-05	0.253914	0.695	0.642	1	12	ENO1	SPP1+Macro
0	0.417324	0.624	0.011	0	13	TRAC	FYN+Macro
0	0.373328	0.584	0.011	0	13	TRBC2	FYN+Macro
1.49568e-303	0.340049	0.504	0.013	6.26108e-299	13	SPOCK2	FYN+Macro
1.24566e-206	0.402212	0.584	0.032	5.21447e-202	13	ETS1	FYN+Macro
2.99583e-164	0.417051	0.592	0.043	1.25408e-159	13	FYN	FYN+Macro
7.13956e-35	0.465867	0.688	0.233	2.98869e-30	13	DUSP4	FYN+Macro
7.72876e-24	0.395387	0.816	0.462	3.23533e-19	13	CXCR4	FYN+Macro
9.14359e-20	0.371156	0.96	0.843	3.8276e-15	13	RPS29	FYN+Macro
9.55905e-17	0.31071	0.992	0.948	4.00152e-12	13	RPL41	FYN+Macro
3.99951e-16	0.277503	0.768	0.444	1.67424e-11	13	ZFP36L2	FYN+Macro
3.14978e-15	0.334473	0.976	0.882	1.31853e-10	13	RPL10	FYN+Macro
2.80203e-14	0.281243	0.936	0.684	1.17296e-09	13	BTG1	FYN+Macro
2.80657e-12	0.382658	0.856	0.756	1.17486e-07	13	RPS27	FYN+Macro
1.41839e-11	0.2607	0.944	0.811	5.9375e-07	13	RPS8	FYN+Macro
1.6035e-11	0.281208	0.872	0.689	6.71243e-07	13	RPS25	FYN+Macro
1.07572e-10	0.255163	0.88	0.67	4.50305e-06	13	RPL21	FYN+Macro
2.09526e-10	0.270708	0.872	0.776	8.77099e-06	13	RPS27A	FYN+Macro
3.82334e-10	0.285458	0.888	0.786	1.60049e-05	13	RPL13A	FYN+Macro
0	1.76507	0.505	0.008	0	14	IGLC2	CCL18+Macro
6.94867e-301	1.45371	0.577	0.015	2.90878e-296	14	JCHAIN	CCL18+Macro
4.1841e-184	1.89218	0.423	0.014	1.7515e-179	14	IGHA1	CCL18+Macro
1.53137e-150	1.75441	0.495	0.026	6.41047e-146	14	IGHG2	CCL18+Macro
4.37782e-90	3.62236	0.918	0.224	1.8326e-85	14	IGKC	CCL18+Macro
2.25513e-05	0.450964	0.433	0.264	0.94402	14	FN1	CCL18+Macro
2.68449e-05	0.345394	0.876	0.907	1	14	MT-CYB	CCL18+Macro
0.000288602	0.30843	1	0.986	1	14	MT-RNR2	CCL18+Macro
5.68971e-94	0.59329	0.4	0.006	2.38177e-89	15	IL1RL1	CCL18+Macro
1.8148e-87	0.283604	0.3	0.004	7.59692e-83	15	SPARCL1	CCL18+Macro
1.68855e-72	0.541767	0.3	0.005	7.06846e-68	15	MGP	CCL18+Macro
1.96877e-72	0.266798	0.3	0.005	8.24149e-68	15	AQP1	CCL18+Macro
3.07319e-68	0.940691	0.65	0.025	1.28647e-63	15	TIMP3	CCL18+Macro
4.8723e-62	0.433491	0.3	0.005	2.03959e-57	15	VWF	CCL18+Macro
8.04127e-15	0.534422	0.35	0.034	3.36616e-10	15	PDLIM1	CCL18+Macro
3.02603e-08	0.519595	0.75	0.246	0.00126673	15	EPAS1	CCL18+Macro
9.70205e-06	0.268494	0.4	0.105	0.406138	15	NFATC1	CCL18+Macro
0.000625653	0.44228	0.75	0.426	1	15	CD59	CCL18+Macro
0.000692738	0.268085	0.55	0.253	1	15	IRF1	CCL18+Macro
0.00208726	0.319395	0.4	0.153	1	15	EMP1	CCL18+Macro
0.00258736	0.723872	0.75	0.5	1	15	RNASE1	CCL18+Macro
0.00306156	0.990057	0.65	0.455	1	15	MT2A	CCL18+Macro
0.00732341	0.627764	0.55	0.363	1	15	PECAM1	CCL18+Macro
0.00904726	0.33717	0.75	0.45	1	15	KCTD12	CCL18+Macro
