# Supplementary material for: Single-Cell RNA Sequencing Reveals the Heterogeneity of Tumor-Associated Macrophage in Non-Small Cell Lung Cancer and Differences Between Sexes
Source: Front Immunol. 2021 Nov 5;12:756722. doi: 10.3389/fimmu.2021.756722 (PMC8602907; doi:10.3389/fimmu.2021.756722)
Supplement: Supplementary Table 4 — The mean arcsinh-transformed values of 42 markers in macrophages of each patient, obtained through CyTOF sequencing. [file Table_4.xlsx]

## Sheet: mean arcsinh-transformed values
Atigen	T002	T003	T004	T005	T007	T008	T009	T010
CD45	3.05844	2.09639	1.91569	2.08188	2.19944	2.53909	2.20342	1.91949
CD3	0.0699625	0.186958	0.0852646	0.125083	0.138592	0.130997	0.144871	0.0795952
CD68	4.355	4.29456	4.1094	4.1494	4.57362	4.64647	4.01094	3.80689
CD56	0.197778	0.287695	0.20587	0.155526	0.226789	0.374292	0.228812	0.0870635
gdTCR	0.0599231	0.0622617	0.0845305	0.0732445	0.108984	0.280774	0.105588	0.0516029
CCR6	1.25184	1.18953	0.830314	0.337307	0.737762	1.04854	1.0099	0.200949
CD14	0.680386	1.41682	0.32747	0.789957	0.77372	1.38385	1.78618	0.308624
CD103	0.31281	0.204217	0.154749	0.476396	0.357003	0.264475	0.440608	0.244773
IL-3R	0.681228	0.299962	0.628539	0.713588	0.882722	0.793118	1.15418	0.567014
TIM-3	0.153059	0.0685219	0.0412226	0.0743308	0.0558845	0.198118	0.0919593	0.017517
CD19	0.162618	0.0954092	0.111263	0.12681	0.129206	0.116654	0.0888335	0.0349183
IL-2R	0.0734398	0.0989508	0.0596223	0.0424249	0.112745	0.117702	0.107495	0.0207816
PD-L1	0.20032	0.53923	0.238671	0.432802	0.895758	0.274851	1.35748	0.36603
ICOS	0.187178	0.200669	0.112398	0.0980245	0.177704	0.117297	0.213225	0.0670071
CD39	4.06807	4.30272	3.37283	2.3963	3.48934	3.75962	3.66461	1.6642
CD204	1.38693	1.45957	0.829886	0.876621	1.35563	2.81442	1.83243	1.02973
CD169	0.903765	1.85768	0.564014	0.865652	0.986949	1.28549	0.692672	0.161779
CD45RA	0.501089	1.17227	1.40442	1.1589	1.16289	0.841855	0.749361	0.695827
CD86	3.28343	3.22533	2.52379	1.79974	2.58289	3.64425	2.67811	1.83926
CD28	0.738184	0.826368	0.900332	0.228364	0.335677	1.13949	0.421732	0.142783
CCR7	1.5553	2.17582	1.24454	0.341386	1.12875	1.29449	1.44109	0.141215
CD11c	5.25944	5.22739	4.1127	4.26018	5.06743	5.61434	5.42031	4.37349
CD33	2.95281	3.33898	2.98026	2.40899	2.15036	3.05741	2.15995	0.951687
CTLA-4	0.141652	0.249282	0.11346	0.14611	0.162196	0.218605	0.210899	0.0532547
FoxP3	0.315319	0.284141	0.237586	0.192326	0.352533	0.364914	0.413613	0.187855
CD163	0.69053	1.10193	0.42887	0.994149	0.740203	0.995811	0.940856	0.223633
CD64	3.21437	3.55249	2.06521	2.50437	2.60881	4.6701	3.79023	2.29093
CD66b	0.340944	0.23876	0.464297	0.161399	0.242982	0.234718	0.228795	0.0704635
CXCR3	2.28587	3.27125	2.50888	1.65849	2.3799	2.95091	2.63017	1.05655
MMR	3.25772	4.71897	4.83096	2.96913	4.12203	4.60216	4.09548	3.7511
CD69	2.81	2.77785	2.64556	1.43319	2.21215	1.83676	2.06798	0.873754
Ki-67	2.90437	2.00107	1.59833	0.997657	2.3832	1.92189	2.21027	0.879808
IL-7Ra	0.505738	0.297187	0.267641	0.281161	0.300622	0.163098	0.386918	0.1911
PD-1	0.170404	0.194511	0.119718	0.224531	0.202307	0.132744	0.261663	0.0966497
CD38	1.56818	2.28207	0.691736	3.20462	3.30379	0.466296	3.2102	1.12995
GZMB	0.413813	0.348415	0.293149	0.707604	0.634438	0.22262	0.599839	0.247273
LAG3	0.27093	0.294247	0.206971	0.329213	0.305125	0.288675	0.316346	0.134566
CD16	0.666887	0.545877	0.203277	0.366045	0.317559	0.790429	0.746436	0.222532
HLA-DR	5.71709	5.89455	5.53607	5.37384	5.71374	5.90238	5.68557	5.59822
CD4	5.16436	4.95425	5.49164	5.71856	5.48652	4.52869	5.07543	6.63236
CD8a	0.0427749	0.0987346	0.124197	0.138886	0.148137	0.190072	0.0826121	0.110679
CD11b	3.22955	2.85239	2.90521	1.17984	1.75263	4.70385	1.59461	1.78774
