# Supplementary material for: Single-Cell RNA Sequencing Reveals the Heterogeneity of Tumor-Associated Macrophage in Non-Small Cell Lung Cancer and Differences Between Sexes
Source: Front Immunol. 2021 Nov 5;12:756722. doi: 10.3389/fimmu.2021.756722 (PMC8602907; doi:10.3389/fimmu.2021.756722)
Supplement: Supplementary Table 5 — Differentially Expressed Genes of TAMs from Different Sexes in the discovery single-cell data and validation single-cell data 1. [file Table_5.xlsx]

## Sheet: discovery single-cell data
Supplementary Table 5.Differentially Expressed Genes of TAMs from Different Sexes in the discovery single-cell data and validation single-cell data 1
	p_val	avg_log2FC	pct.1	pct.2	p_val_adj	cluster	gene
HLA-DRB5	1.3927e-213	1.22445	0.931	0.304	4.55941e-209	Male	HLA-DRB5
FTH1	7.01836e-63	0.808456	1	1	2.29767e-58	Male	FTH1
S100A10	3.27571e-57	0.567355	0.994	0.989	1.0724e-52	Male	S100A10
FN1	8.20171e-49	0.615435	0.607	0.273	2.68507e-44	Male	FN1
S100A6	1.71389e-41	0.539256	0.994	0.984	5.61092e-37	Male	S100A6
SPP1	1.85523e-41	0.906723	0.735	0.377	6.07364e-37	Male	SPP1
CSTB	1.82679e-37	0.681258	0.989	0.989	5.98055e-33	Male	CSTB
MT-ND2	5.09062e-32	0.361414	0.996	0.998	1.66657e-27	Male	MT-ND2
VIM	1.43812e-30	0.490503	0.995	0.996	4.70813e-26	Male	VIM
ALOX5AP	4.74442e-28	0.46078	0.675	0.468	1.55323e-23	Male	ALOX5AP
FABP5	4.06984e-27	0.460243	0.867	0.8	1.33238e-22	Male	FABP5
FBP1	3.96219e-26	0.298557	0.78	0.636	1.29714e-21	Male	FBP1
S100A4	2.48183e-25	0.422166	0.954	0.929	8.12503e-21	Male	S100A4
ANXA1	3.44853e-25	0.272849	0.915	0.856	1.12898e-20	Male	ANXA1
MARCO	9.71923e-25	0.319414	0.746	0.53	3.18188e-20	Male	MARCO
FTL	1.75976e-23	0.531638	1	1	5.76112e-19	Male	FTL
MMP9	5.56533e-18	0.330997	0.283	0.102	1.82198e-13	Male	MMP9
LGALS1	1.46051e-17	0.297387	0.997	0.993	4.78141e-13	Male	LGALS1
CCL18	2.95329e-17	1.10788	0.739	0.561	9.66849e-13	Male	CCL18
FABP4	3.05534e-16	0.296876	0.252	0.082	1.00026e-11	Male	FABP4
TXNIP	3.22469e-13	0.252602	0.904	0.922	1.0557e-08	Male	TXNIP
GCHFR	8.50208e-12	0.27146	0.647	0.576	2.78341e-07	Male	GCHFR
CTSB	3.76082e-09	0.26774	0.985	0.982	0.000123122	Male	CTSB
LYZ	1.97995e-08	0.279208	0.992	0.98	0.000648198	Male	LYZ
SERPINA1	3.14515e-06	0.273716	0.885	0.896	0.102966	Male	SERPINA1
TIMP1	1.22009e-05	0.45211	0.879	0.863	0.399435	Male	TIMP1
HBA1	3.92993e-152	0.271253	0.375	0.044	1.28658e-147	Female	HBA1
EPSTI1	2.74808e-136	0.316359	0.827	0.321	8.99667e-132	Female	EPSTI1
CXCL10	7.62269e-118	1.04117	0.43	0.077	2.49552e-113	Female	CXCL10
IFITM3	4.86211e-113	0.704485	0.945	0.564	1.59176e-108	Female	IFITM3
ISG20	2.857e-107	0.290299	0.561	0.147	9.35326e-103	Female	ISG20
TNFSF10	3.34423e-99	0.304312	0.572	0.178	1.09483e-94	Female	TNFSF10
IGLL5	1.01164e-88	0.692443	0.596	0.243	3.31189e-84	Female	IGLL5
FAM26F	1.22073e-88	0.574994	0.778	0.386	3.99644e-84	Female	FAM26F
MX1	2.34495e-88	0.307989	0.636	0.24	7.67691e-84	Female	MX1
LAP3	1.61707e-85	0.323742	0.889	0.603	5.29397e-81	Female	LAP3
PSMB9	3.10223e-84	0.360453	0.911	0.576	1.01561e-79	Female	PSMB9
GBP1	2.44788e-77	0.342811	0.676	0.306	8.01387e-73	Female	GBP1
RPS4X	1.46924e-72	0.45041	0.998	0.993	4.81001e-68	Female	RPS4X
PSME2	1.66301e-70	0.445503	0.953	0.786	5.44435e-66	Female	PSME2
VAMP5	5.84816e-70	0.443464	0.889	0.596	1.91457e-65	Female	VAMP5
HBB	1.85969e-66	0.823408	0.406	0.139	6.08825e-62	Female	HBB
STAT1	2.08469e-66	0.268356	0.812	0.503	6.82487e-62	Female	STAT1
HBA2	5.79665e-64	0.325916	0.388	0.129	1.89771e-59	Female	HBA2
ISG15	1.45684e-60	1.01658	0.86	0.57	4.76941e-56	Female	ISG15
IFI27	2.75724e-60	1.38234	0.63	0.299	9.02664e-56	Female	IFI27
CXCL9	1.10334e-57	0.332339	0.353	0.096	3.61213e-53	Female	CXCL9
TNFSF13B	2.97321e-57	0.271194	0.856	0.579	9.7337e-53	Female	TNFSF13B
HLA-E	4.90034e-50	0.275195	0.989	0.956	1.60427e-45	Female	HLA-E
HLA-A	1.8218e-49	0.488645	0.998	0.996	5.9642e-45	Female	HLA-A
IGSF6	5.2356e-44	0.270162	0.818	0.604	1.71403e-39	Female	IGSF6
MNDA	3.37781e-43	0.301325	0.896	0.712	1.10583e-38	Female	MNDA
HLA-C	1.70677e-31	0.314933	0.998	0.984	5.58761e-27	Female	HLA-C
TYMP	2.02057e-31	0.410412	0.978	0.959	6.61495e-27	Female	TYMP
CCL8	6.05541e-31	0.256342	0.146	0.031	1.98242e-26	Female	CCL8
LY6E	1.15846e-27	0.425093	0.834	0.687	3.79256e-23	Female	LY6E
HLA-DRB1	1.84706e-24	0.42	0.991	0.981	6.04691e-20	Female	HLA-DRB1
B2M	2.26878e-22	0.294804	1	1	7.42753e-18	Female	B2M
IFI6	2.66888e-20	0.320435	0.834	0.68	8.73738e-16	Female	IFI6
C1QC	1.27855e-11	0.349759	0.785	0.738	4.1857e-07	Female	C1QC
C1QA	1.06268e-08	0.379547	0.845	0.83	0.000347899	Female	C1QA
C1QB	1.26246e-08	0.345749	0.838	0.801	0.000413305	Female	C1QB
RGS1	1.16733e-07	0.256775	0.783	0.714	0.0038216	Female	RGS1
APOE	6.68053e-06	0.578105	0.863	0.859	0.218707	Female	APOE

## Sheet: validation single-cell data 1
	p_val	avg_logFC	pct.1	pct.2	p_val_adj	cluster	gene
LYZ	2.55866e-163	0.632189	0.943	0.834	1.07108e-158	Male	LYZ
FN1	6.86825e-153	0.510203	0.427	0.136	2.87512e-148	Male	FN1
MT-ND1	1.0728e-142	0.340139	0.977	0.956	4.49087e-138	Male	MT-ND1
B2M	2.59375e-125	0.284341	0.991	0.978	1.08577e-120	Male	B2M
CXCL9	6.25803e-112	0.300946	0.198	0.026	2.61967e-107	Male	CXCL9
HLA-DRB5	8.36092e-112	0.45508	0.68	0.445	3.49997e-107	Male	HLA-DRB5
RPL23	2.91805e-88	0.251065	0.86	0.668	1.22152e-83	Male	RPL23
SPP1	6.96788e-47	0.275397	0.528	0.338	2.91683e-42	Male	SPP1
IGKC	4.05558e-21	0.356054	0.289	0.19	1.69771e-16	Male	IGKC
XIST	0	0.325476	0.478	0.01	0	Female	XIST
THBS1	3.39008e-107	0.437542	0.39	0.169	1.41912e-102	Female	THBS1
C1QC	4.14318e-74	0.256836	0.54	0.331	1.73438e-69	Female	C1QC
GPNMB	7.22734e-52	0.296607	0.827	0.809	3.02544e-47	Female	GPNMB
EGR1	1.19143e-49	0.28673	0.483	0.335	4.98746e-45	Female	EGR1
NEAT1	1.09321e-34	0.253741	0.849	0.838	4.57627e-30	Female	NEAT1
PLIN2	2.89802e-33	0.258675	0.609	0.575	1.21314e-28	Female	PLIN2
CXCL8	8.25634e-27	0.353326	0.659	0.594	3.45619e-22	Female	CXCL8
CHIT1	1.23689e-06	0.372857	0.151	0.118	0.0517776	Female	CHIT1
